# Supplementary material
Source: PubMed Central journal article supplement (PMC5369770)
Supplement: NIHMS843536-supplement-supp_figs_tables.pdf [file NIHMS843536-supplement-supp_figs_tables.pdf]

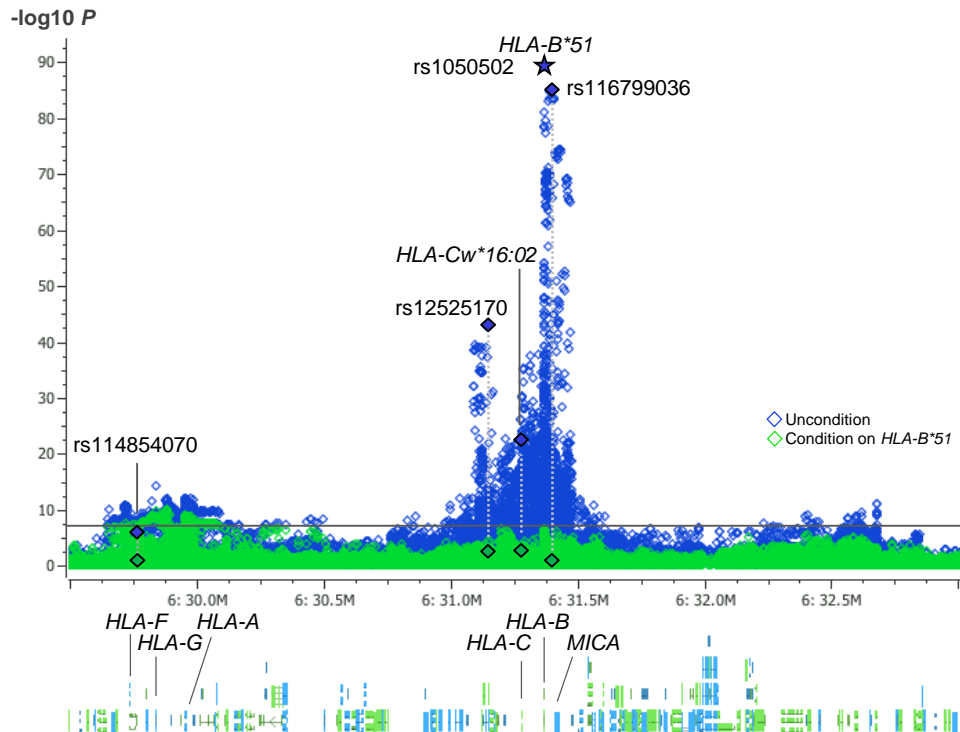

Supplementary Figure 1: Genetic association of imputed markers and HLA types in the MHC region.

The solid line indicates the threshold for genome-wide significance ( $P = 5 \times 10^{-8}$ ). Build 37/hg19 was applied for the map positions. *HLA-B\*51* showed the strongest association with Behçet's disease ( $P = 5.67 \times 10^{-90}$ ). Four markers reported in the previous Immunochip study<sup>17</sup> were labeled. The  $P$ -value for rs116799036 was  $1.3 \times 10^5$  fold higher (less significant) than the  $P$ -value for *HLA-B\*51*. In addition, disease associations of the four reported independent markers were fully attenuated after conditioning on *HLA-B\*51*.

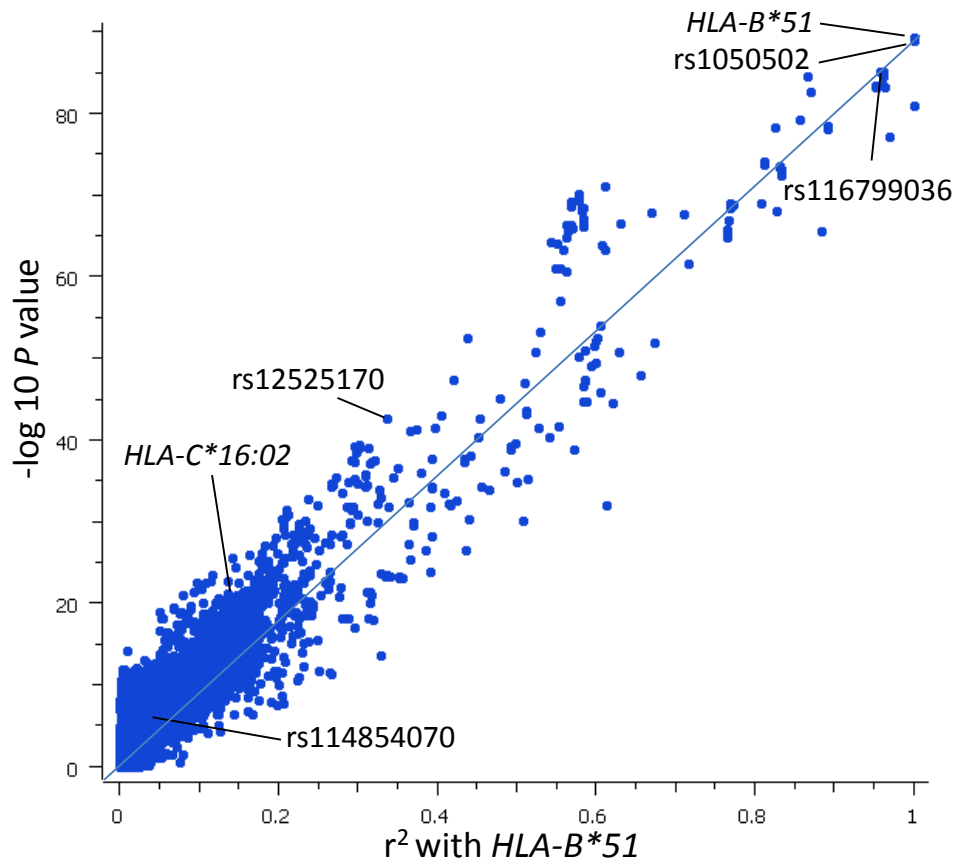

Supplementary Figure 2: HLA region marker associations are highly correlated with their LD with *HLA-B\*51*.

53,936 Markers located in the MHC region (28 - 34 Mb in Chromosome 6) and HLA types were analyzed.

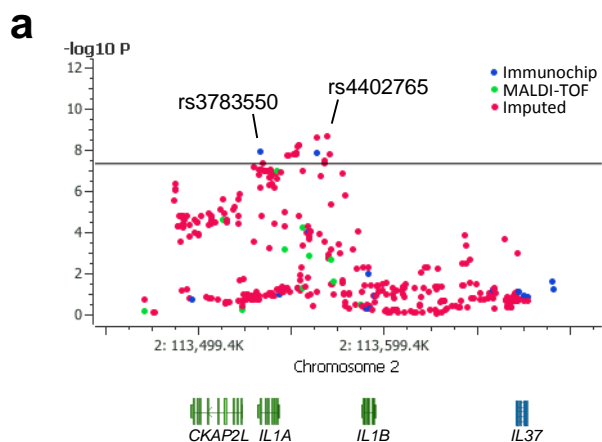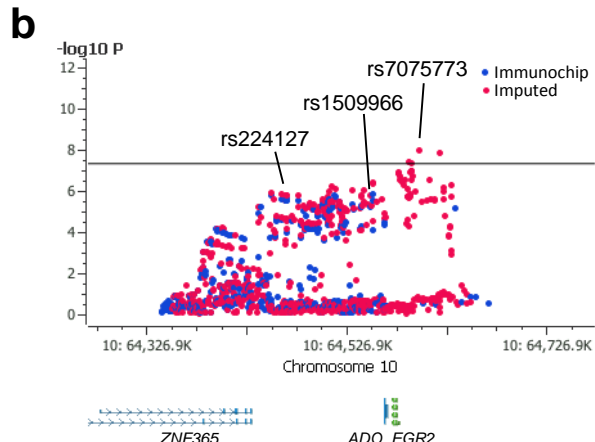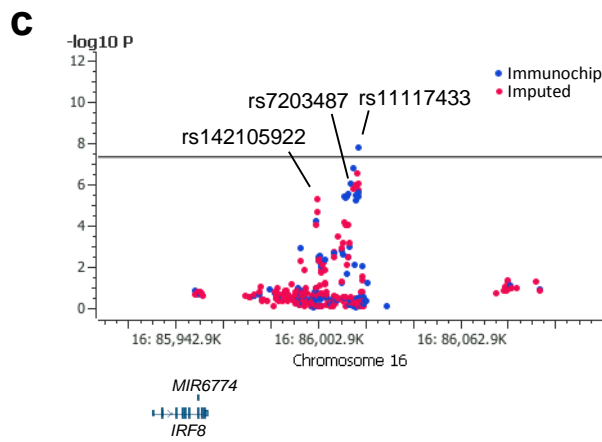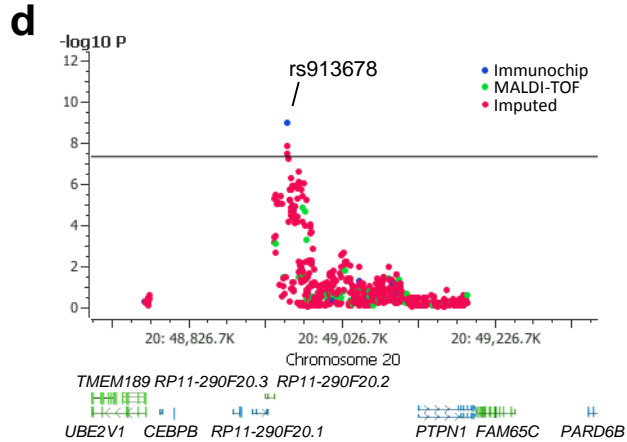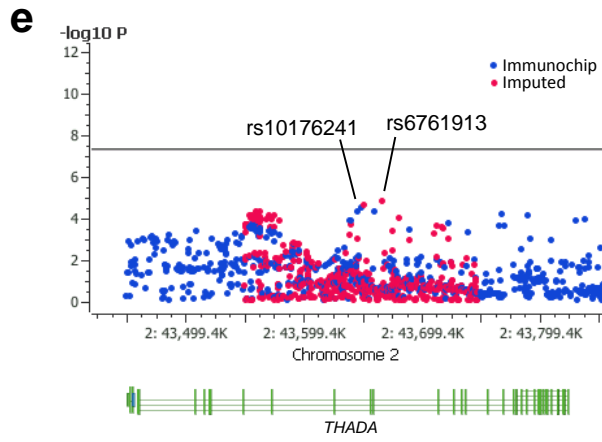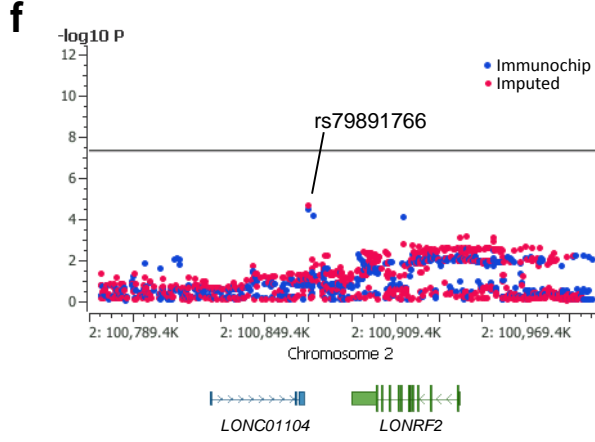

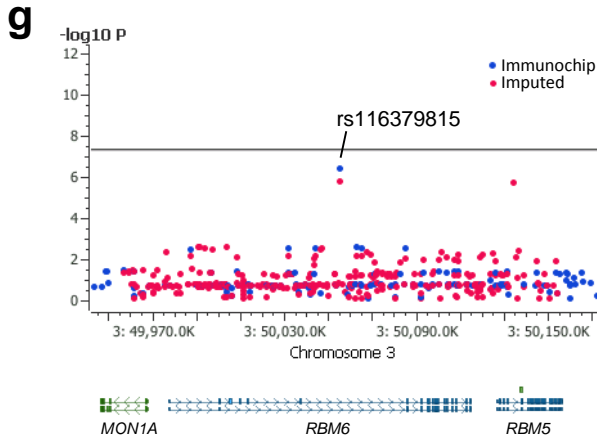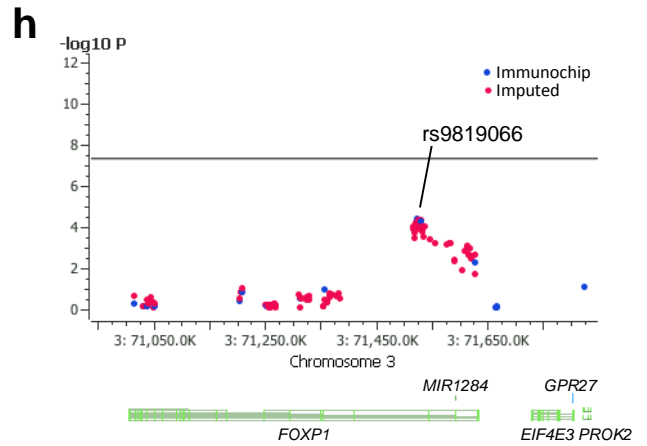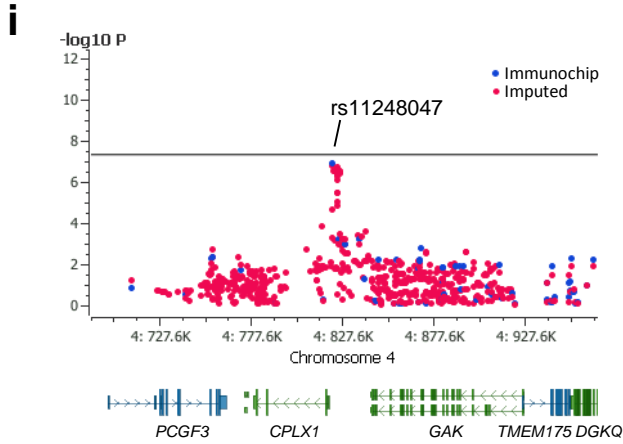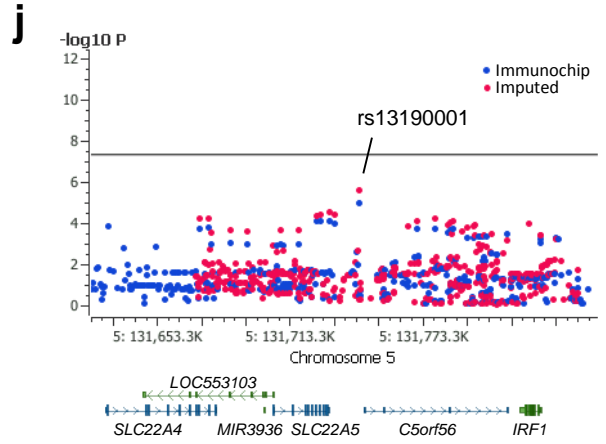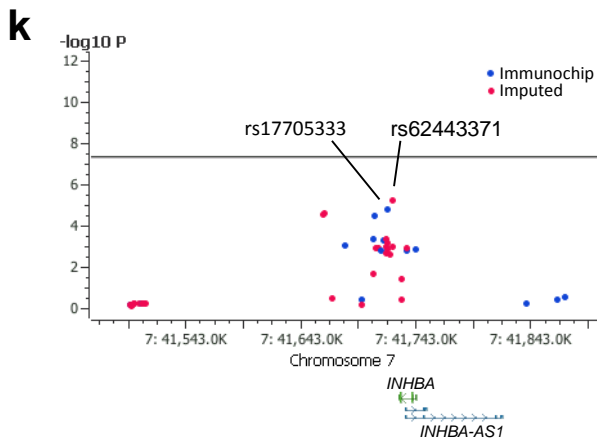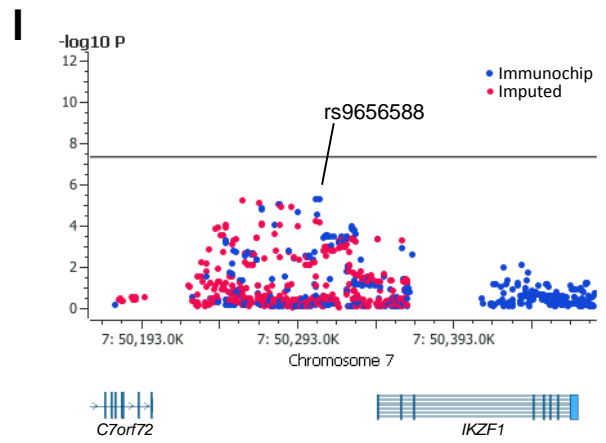

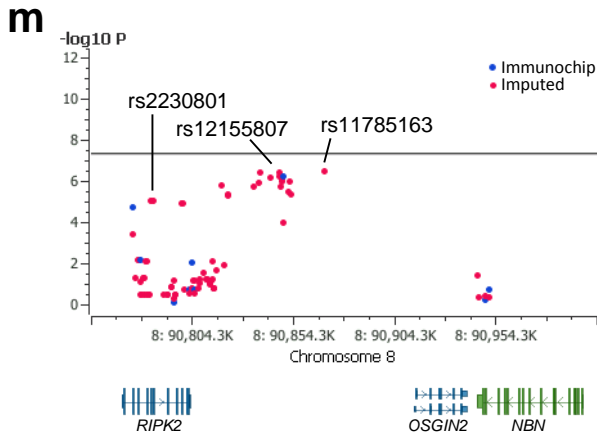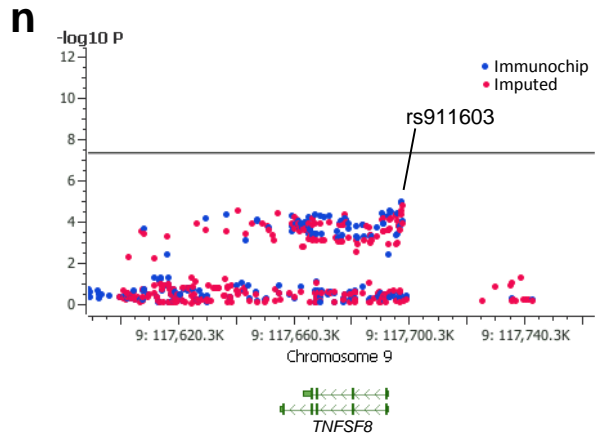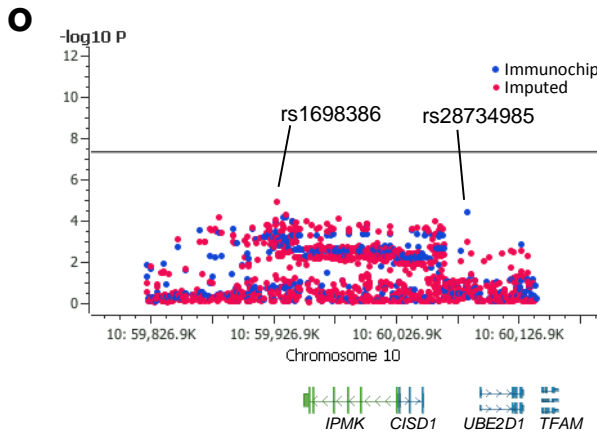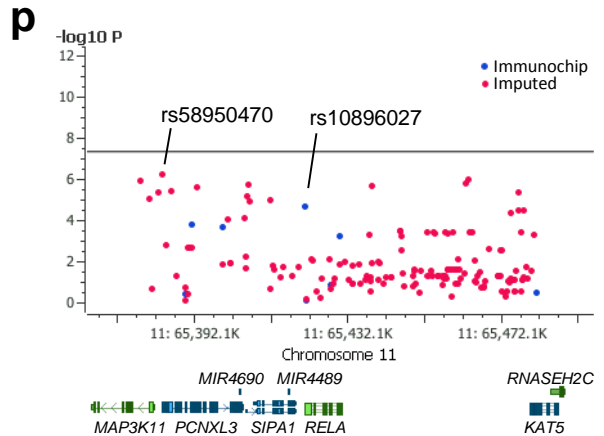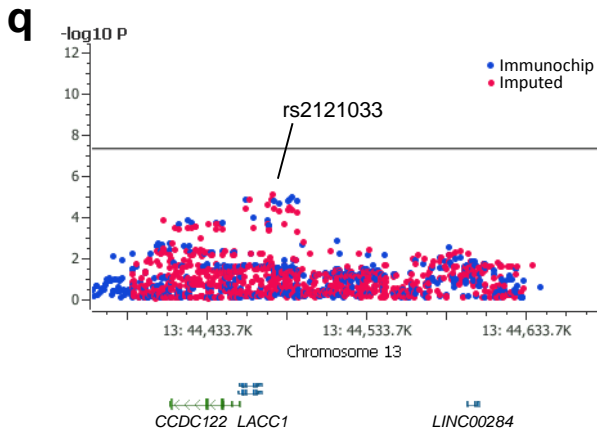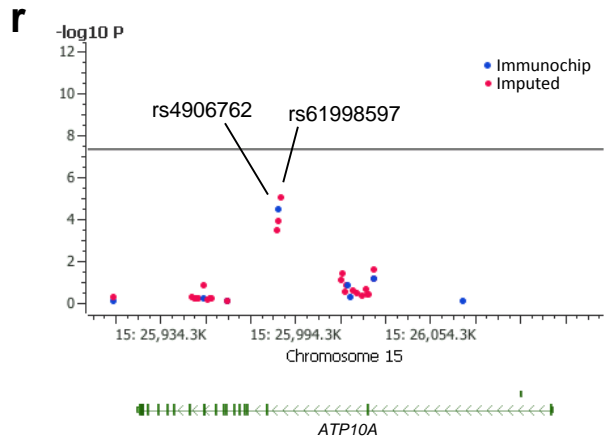

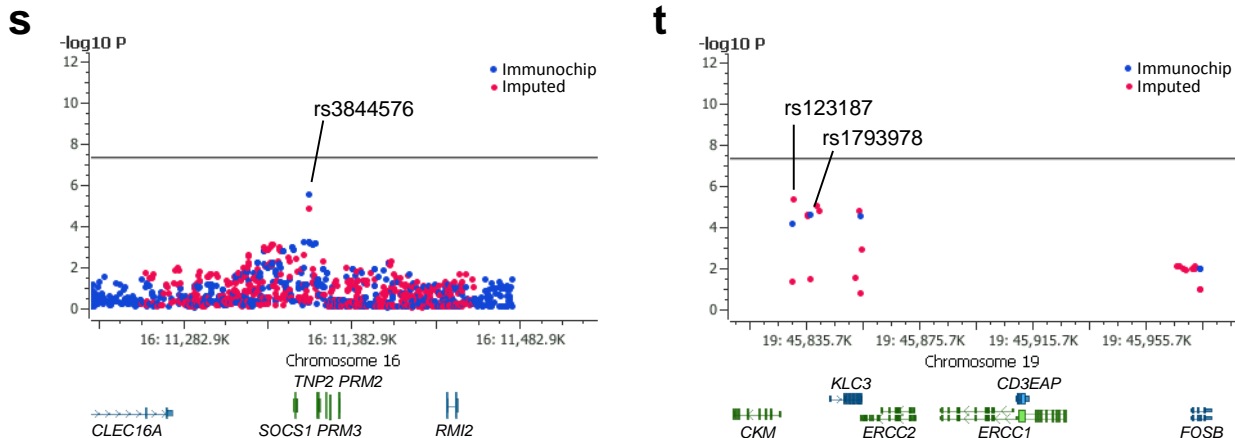

Supplementary Figure 3: Novel loci with suggestive associations ( $P < 5 \times 10^{-5}$ ) in the basic allele test in the Turkish population by direct genotyping or imputation.

Solid line indicates genome-wide significance ( $P < 5 \times 10^{-8}$ ). Build 37/hg19 was applied for marker maps. (a) The *IL1A-IL1B* locus. (b) The *ADO-EGR2* locus. (c) The *IRF8* locus. (d) The *CEBPB-PTPN1* locus. (e) The *THADA* locus. (f) The *LONRF2* locus. (g) The *RBM6* locus. (h) The *FOXP1* locus. (i) The *CPLX1* locus. (j) The *C5orf56* locus. (k) The *INHBA* locus. (l) The *IKZF1* locus. (m) The *RIPK2* locus. (n) The *TNFSF8* locus. (o) The *IPMK-UBE2D1* locus. (p) The *MAP3K11-KAT5* locus. (q) The *LACC1* locus. (r) The *ATP10A* locus. (s) The *SOCS1-TNP2* locus. (t) The *CKM-KLC3* locus. Four loci (a-d) reached genome-wide significance.

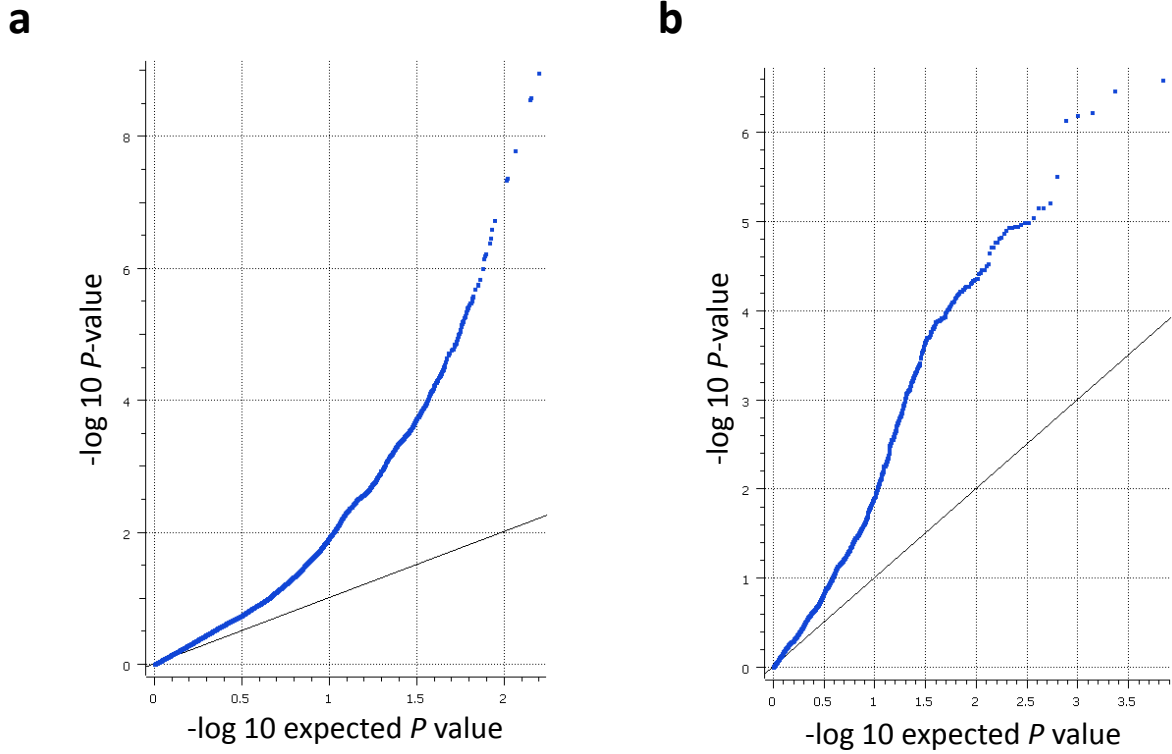

Supplementary Figure 4: P-P plots of the association test for markers located within the reported susceptibility loci for other diseases in the current study.

Markers located within the reported susceptibility loci for IBD (a), and leprosy (b). Markers located within the MHC region were excluded in this analysis.

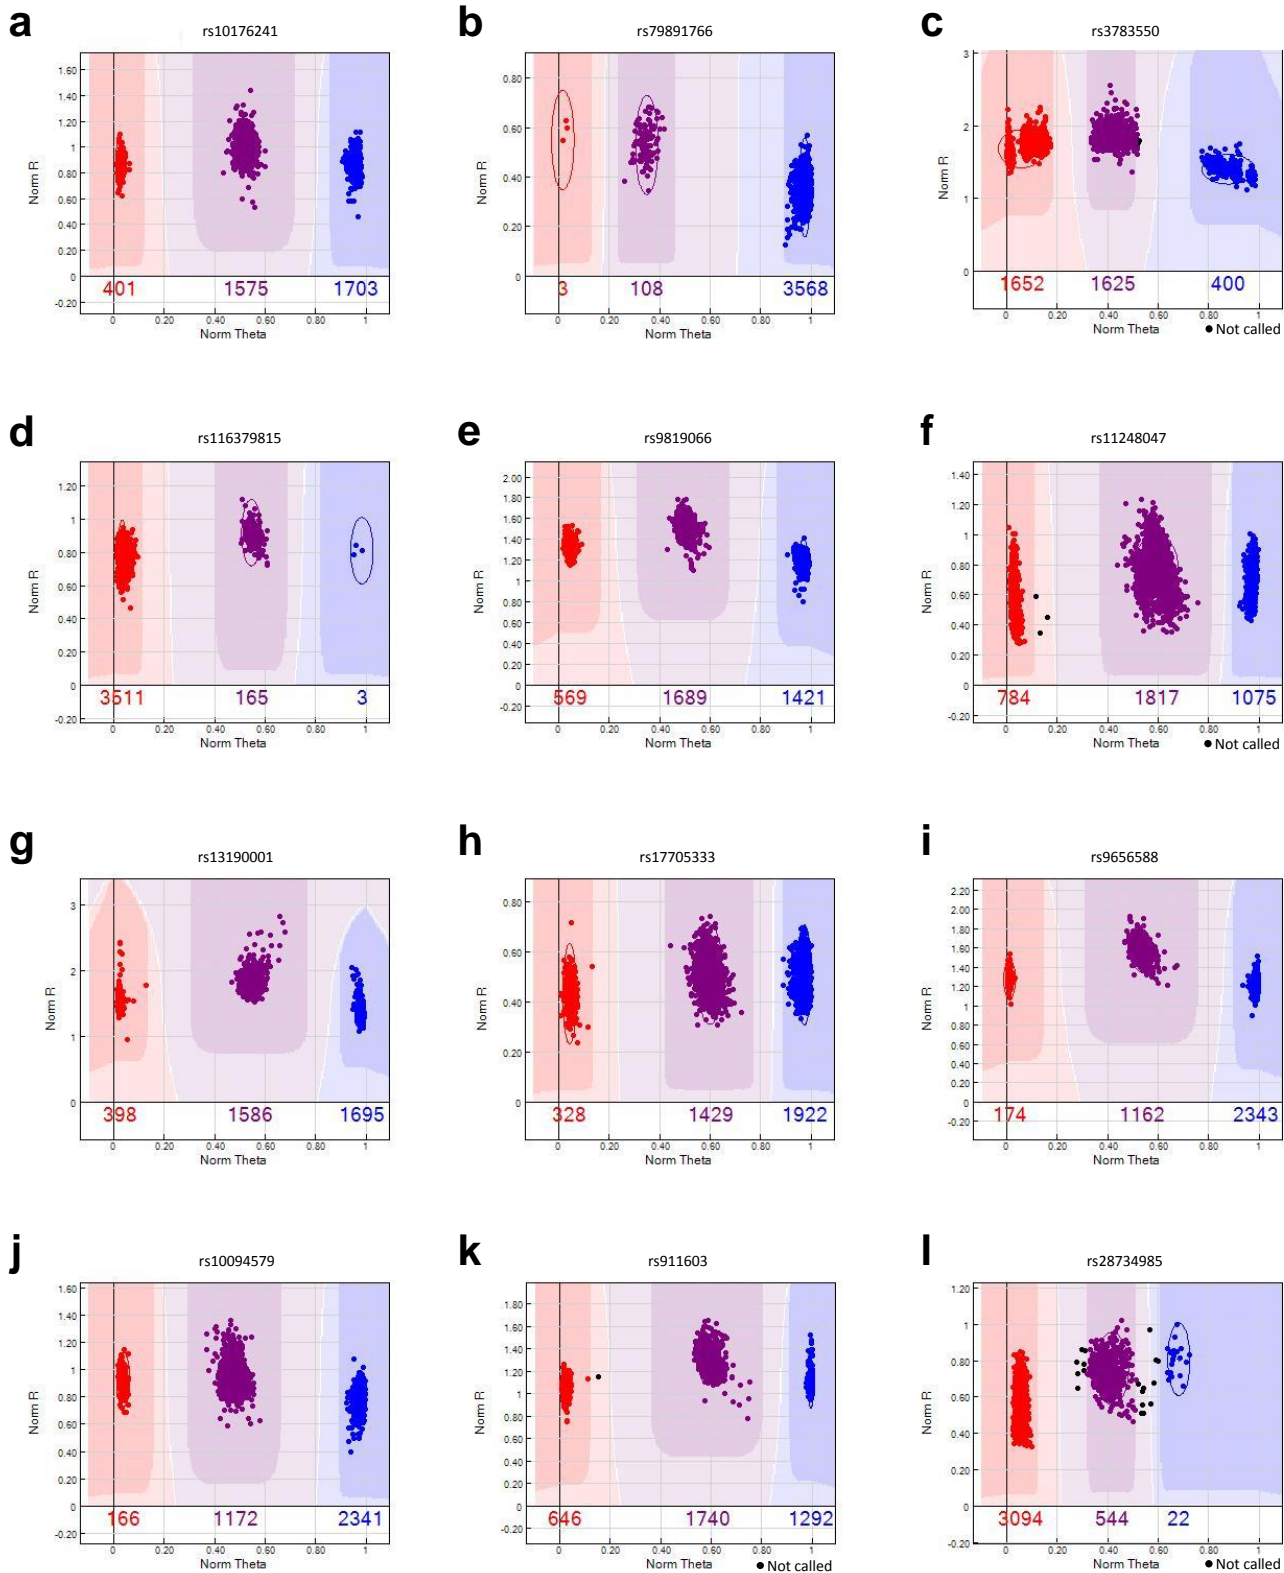



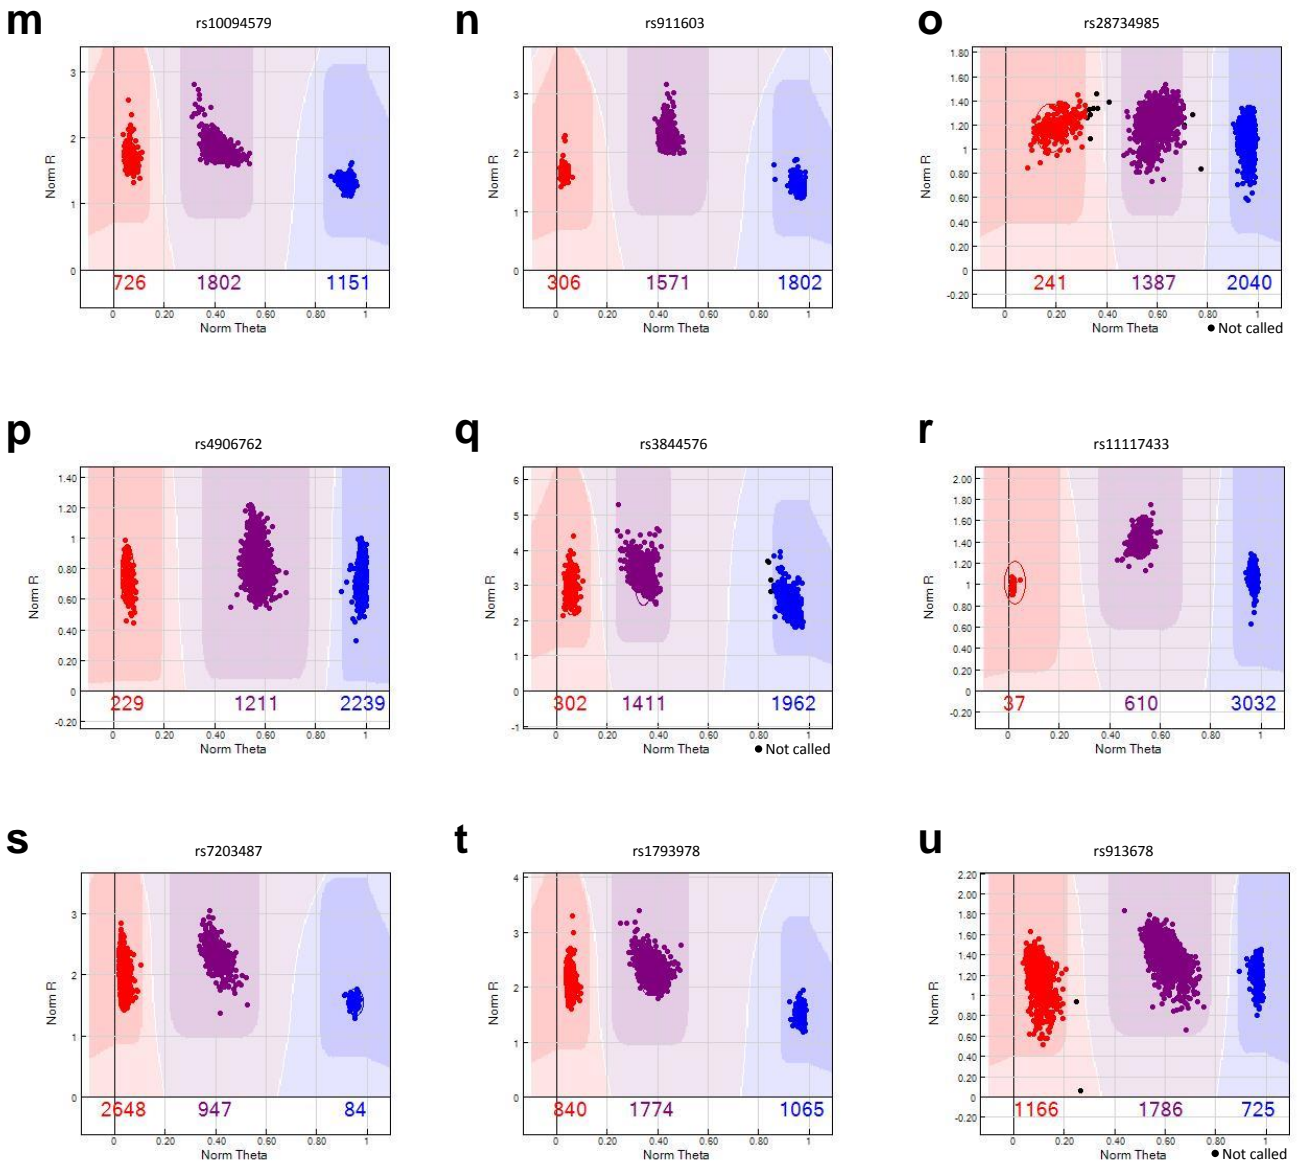

Supplementary Figure 5: The genotype clusters of the lead SNP in each novel suggestive susceptibility locus.

(a) The *THADA* locus. (b) The *LONRF2* locus. (c) The *IL1A-IL1B* locus. (d) The *RBM6* locus. (e) The *FOXP1* locus. (f) The *CPLX1* locus. (g) The *C5orf56* locus. (h) The *INHBA* locus. (i) The *IKZF1* locus. (j) The *RIPK2* locus. (k) The *TNFSF8* locus. (l) The *IPMK-UBE2D1* locus. (m) The *ADO-EGR2* locus. (n) The *MAP3K11-KAT5* locus. (o) The *LACC1* locus. (p) The *ATP10A* locus. (q) The *SOCS1-TNP2* locus. (r) The *IRF8* locus. (s) The *IRF8* locus (independent marker). (t) The *CKM-KLC3* locus. (u) The *CEBPB-PTPN1* locus.

**a**

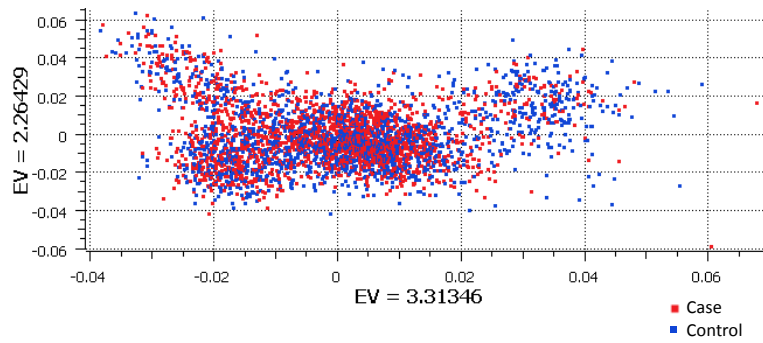

**b**

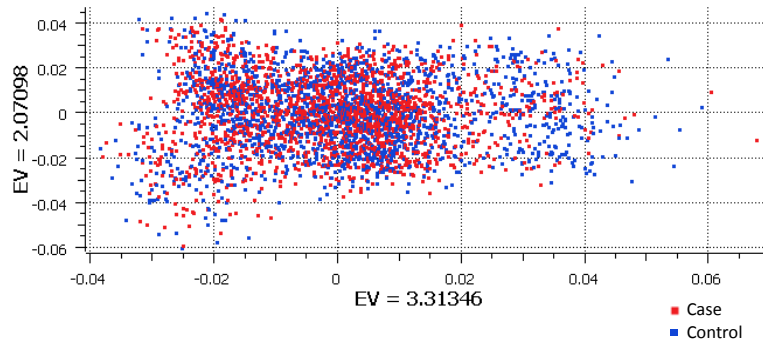

Supplementary Figure 6: Analysis of genetic matching of cases and controls.

(a) Principal components analysis (PCA)-first versus second component. (b) PCA-first versus third component (LD-pruned data with marker pairwise  $r^2 < 0.5$ ).

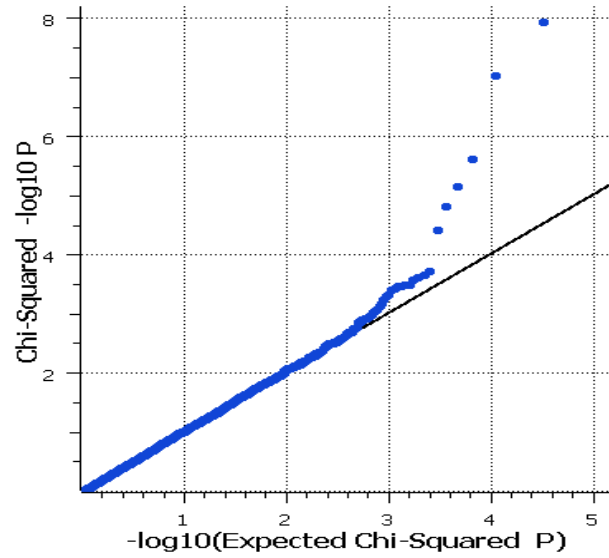

Supplementary Figure 7: P-P plot demonstrating minimal genomic inflation.

LD-pruned data after removing long LD regions including the MHC region were used to calculate genomic inflation ( $\lambda_{GC}$  is 1.031 and  $\lambda_{1000}$  is 1.017).

Supplementary Table 1: Numeric association testing of imputed HLA class I and II types in 1900 Behçet's disease cases and 1779 controls from Turkey.

| HLA type           | Allele Frequency |          | P- value | OR   | 95% CI      |
|--------------------|------------------|----------|----------|------|-------------|
|                    | Cases            | Controls |          |      |             |
| <i>HLA-B*51</i>    | 0.380            | 0.168    | 5.67E-90 | 3.26 | 2.89 - 3.68 |
| <i>HLA-Cw*15</i>   | 0.139            | 0.068    | 4.24E-22 | 2.16 | 1.84 - 2.53 |
| <i>HLA-Cw*16</i>   | 0.100            | 0.049    | 2.24E-15 | 2.06 | 1.72 - 2.48 |
| <i>HLA-Cw*14</i>   | 0.092            | 0.044    | 1.50E-15 | 2.16 | 1.78 - 2.63 |
| <i>HLA-A*02</i>    | 0.308            | 0.242    | 5.75E-10 | 1.38 | 1.25 - 1.53 |
| <i>HLA-A*03</i>    | 0.081            | 0.125    | 1.36E-09 | 0.63 | 0.54 - 0.73 |
| <i>HLA-Cw*12</i>   | 0.091            | 0.135    | 1.75E-09 | 0.64 | 0.55 - 0.74 |
| <i>HLA-B*18</i>    | 0.033            | 0.063    | 2.18E-09 | 0.51 | 0.40 - 0.64 |
| <i>HLA-DQB1*03</i> | 0.496            | 0.435    | 3.65E-07 | 1.27 | 1.16 - 1.39 |
| <i>HLA-B*49</i>    | 0.019            | 0.038    | 1.69E-06 | 0.50 | 0.37 - 0.67 |
| <i>HLA-Cw*07</i>   | 0.155            | 0.196    | 4.35E-06 | 0.75 | 0.67 - 0.85 |
| <i>HLA-B*35</i>    | 0.116            | 0.154    | 7.49E-06 | 0.73 | 0.64 - 0.84 |
| <i>HLA-A*33</i>    | 0.013            | 0.028    | 9.32E-06 | 0.48 | 0.34 - 0.67 |
| <i>HLA-DQB1*02</i> | 0.116            | 0.151    | 1.61E-05 | 0.75 | 0.65 - 0.85 |

Supplementary Table 2: Numeric association testing and conditional analysis of imputed two-digit MHC Class I and II alleles in the additive model in 1900 Behçet's disease cases and 1779 controls from Turkey.

| HLA Allele      | Covariates                | P- Value | OR   | 95% CI      |
|-----------------|---------------------------|----------|------|-------------|
| <i>HLA-B*51</i> | None                      | 5.67E-90 | 3.26 | 2.89 - 3.68 |
| <i>HLA-A*03</i> | <i>HLA-B*51</i>           | 3.73E-09 | 0.62 | 0.52 - 0.72 |
| <i>HLA-B*15</i> | <i>HLA-B*51, HLA-A*03</i> | 2.53E-06 | 1.76 | 1.39 - 2.23 |

P- value <  $5 \times 10^{-5}$  was considered independent association in conditional regression analysis.

Supplementary Table 3: Association results in 1900 Behçet's disease cases and 1779 controls from Turkey for the markers reported with genome-wide significant association in previous studies.

| Variant                | Nearest gene(s)      | Chr. | Position<br>hg19 | Type      | Risk/Protective<br>Allele <sup>a</sup> | RAF<br>cases | RAF<br>controls | OR   | 95% CI      | P-value <sup>b</sup> | Reported<br>OR | Reported<br>95% CI | Reported<br>P-value | Reference |
|------------------------|----------------------|------|------------------|-----------|----------------------------------------|--------------|-----------------|------|-------------|----------------------|----------------|--------------------|---------------------|-----------|
| rs1495965              | <i>IL23R-IL12RB2</i> | 1    | 67753508         | Genotyped | C/T                                    | 0.571        | 0.519           | 1.23 | 1.13 - 1.35 | 6.98E-06             | 1.35           | 1.24 - 1.47        | 1.9E-11             | [1]       |
| rs924080               | <i>IL23R-IL12RB2</i> | 1    | 67760140         | Genotyped | T/C                                    | 0.669        | 0.612           | 1.28 | 1.16 - 1.41 | 3.44E-07             | 1.28           | 1.18 - 1.39        | 6.69E-09            | [2]       |
| rs1518111              | <i>IL10</i>          | 1    | 206944645        | Genotyped | T/C                                    | 0.367        | 0.302           | 1.34 | 1.22 - 1.48 | 2.74E-09             | 1.45           | 1.34 - 1.58        | 3.54E-18            | [2]       |
| rs1800871              | <i>IL10</i>          | 1    | 206946634        | Genotyped | A/G                                    | 0.374        | 0.313           | 1.31 | 1.19 - 1.44 | 4.36E-08             | 1.45           | 1.32 - 1.60        | 1.0E-14             | [1]       |
| rs7574070 <sup>c</sup> | <i>STAT4</i>         | 2    | 192010488        | -         | A/C                                    |              |                 |      |             |                      | 1.27           | 1.17 - 1.37        | 1.29E-09            | [5]       |
| rs897200 <sup>c</sup>  | <i>STAT4</i>         | 2    | 192017771        | -         | A/G                                    |              |                 |      |             |                      | 1.45           | 1.30 - 1.60        | 6.20E-09            | [4]       |
| rs7616215              | <i>CCR1</i>          | 3    | 46205686         | Genotyped | T/C                                    | 0.730        | 0.660           | 1.40 | 1.26 - 1.54 | 4.94E-11             | 1.39           | 1.27 - 1.52        | 4.30E-13            | [5]       |
| rs13092160             | <i>CCR1</i>          | 3    | 46254791         | Genotyped | T/C                                    | 0.899        | 0.857           | 1.49 | 1.29 - 1.72 | 2.79E-08             | 3.57           | 2.5 - 5.0          | 4.33E-09            | [3]       |
| rs17810546             | <i>IL12A</i>         | 3    | 159665050        | Genotyped | G/A                                    | 0.088        | 0.056           | 1.63 | 1.36 - 1.96 | 1.01E-07             | 1.66           | 1.42 - 1.93        | 1.12E-10            | [9]       |
| rs1874886              | <i>IL12A</i>         | 3    | 159729655        | Genotyped | A/G                                    | 0.349        | 0.319           | 1.14 | 1.04 - 1.26 | 0.0067               | 1.61           | 1.36 - 1.89        | 1.62E-08            | [10]      |
| rs17482078             | <i>ERAP1</i>         | 5    | 96118866         | Genotyped | TT/TC+CC <sup>e</sup>                  | 0.167        | 0.143           | 2.46 | 1.65 - 3.68 | 5.80E-06             | 4.56           | 2.88 - 7.22        | 4.73E-11            | [5]       |
| rs7753873 <sup>d</sup> | <i>TNFAIP3</i>       | 6    | 138173422        | Genotyped | A/C                                    | 0.903        | 0.899           | 1.04 | 0.90 - 1.22 | 0.59                 | 1.81           | 1.51 - 2.18        | 8.35E-11            | [7]       |
| rs2848479              | <i>JRKL-CNTN5</i>    | 11   | 98087599         | Genotyped | A/G                                    | 0.442        | 0.442           | 1.00 | 0.91 - 1.09 | 0.94                 | 1.66           | 1.42 - 1.94        | 3.29E-10            | [10]      |
| rs2617170              | <i>KLRC4</i>         | 12   | 10560957         | Genotyped | C/T                                    | 0.683        | 0.629           | 1.27 | 1.16 - 1.40 | 8.77E-07             | 1.28           | 1.18 - 1.39        | 1.34E-09            | [5]       |
| M694V <sup>c</sup>     | <i>MEFV</i>          | 16   | 3293407          | -         | A/G                                    |              |                 |      |             |                      | 2.65           |                    | 1.79E-12            | [6]       |
| rs681343               | <i>FUT2</i>          | 19   | 49206462         | Imputed   | T/C                                    | 0.562        | 0.510           | 1.23 | 1.12 - 1.35 | 8.58E-06             | 1.30           | 1.19 - 1.41        | 4.78E-09            | [8]       |

<sup>a</sup>Risk and protective alleles are based on original studies<sup>1-10</sup>.

<sup>b</sup>P-value < 0.0045 was considered significantly confirmed (see methods).

<sup>c</sup>Markers were not genotyped or imputed in the current study.

<sup>d</sup>Because no data were available for rs9494885, the result of rs7753873 ( $r^2=1$ ) is shown in the table.

<sup>e</sup>The recessive model was applied for rs17482078 as the original study reported.

Supplementary Table 4: Comparison of statistical power between this study and the previous GWAS for loci with newly identified genome-wide significant associations in the Turkish population.

| ImmunoChip<br>Lead SNP | Nearest gene(s)           | Statistical Power                        |                                    | SNP in high LD<br>on GWAS chip | $P_{GWAS}$ |
|------------------------|---------------------------|------------------------------------------|------------------------------------|--------------------------------|------------|
|                        |                           | 1900 cases/1779 controls<br>(ImmunoChip) | 1215 cases/1278 controls<br>(GWAS) |                                |            |
| rs3783550              | <i>IL1A-IL1B</i>          | 0.62                                     | 0.24                               | rs10496444 ( $r^2=0.98$ )      | 0.0021     |
| rs17753641             | <i>IL12A</i> <sup>a</sup> | 0.79                                     | 0.36                               | No                             | -          |
| rs11117433             | <i>IRF8</i>               | 0.61                                     | 0.24                               | No                             | -          |
| rs913678               | <i>CEBPB-PTPN1</i>        | 0.74                                     | 0.36                               | rs913678                       | 3.10E-05   |

<sup>a</sup>*IL12A* had a marker (rs17810546) with suggestive evidence for association in the GWAS collection that did not reach statistical significance with the Turkish replication collection<sup>3</sup>.

Supplementary Table 5: Association with Behçet's disease in Turkish discovery collection (1900 cases and 1779 controls) of lead SNPs genotyped by the ImmunoChip for novel suggestive loci with  $P < 5 \times 10^{-5}$ .

| Marker      | Nearest gene(s)     | Chr. | Position hg19 | Minor/Major allele | MAF cases | MAF controls | OR   | 95% CI      | <i>P</i> |
|-------------|---------------------|------|---------------|--------------------|-----------|--------------|------|-------------|----------|
| rs10176241  | <i>THADA</i>        | 2    | 43648176      | A/G                | 0.301     | 0.347        | 0.81 | 0.74 - 0.90 | 3.05E-05 |
| rs79891766  | <i>LONRF2</i>       | 2    | 100869755     | T/C                | 0.010     | 0.022        | 0.44 | 0.30 - 0.66 | 3.60E-05 |
| rs116379815 | <i>RBM6</i>         | 3    | 50055358      | G/A                | 0.032     | 0.014        | 2.31 | 1.65 - 3.22 | 4.17E-07 |
| rs9819066   | <i>FOXP1</i>        | 3    | 71523110      | T/C                | 0.407     | 0.360        | 1.22 | 1.11 - 1.34 | 4.56E-05 |
| rs11248047  | <i>CPLX1</i>        | 4    | 821553        | A/G                | 0.431     | 0.492        | 0.78 | 0.71 - 0.86 | 1.27E-07 |
| rs13190001  | <i>C5orf56</i>      | 5    | 131744482     | T/C                | 0.347     | 0.299        | 1.24 | 1.13 - 1.37 | 1.19E-05 |
| rs17705333  | <i>INHBA</i>        | 7    | 41718754      | A/G                | 0.262     | 0.307        | 0.80 | 0.72 - 0.89 | 1.82E-05 |
| rs9656588   | <i>IKZF1</i>        | 7    | 50306780      | T/C                | 0.184     | 0.227        | 0.77 | 0.69 - 0.86 | 5.28E-06 |
| rs10094579  | <i>RIPK2</i>        | 8    | 90849305      | A/C                | 0.227     | 0.180        | 1.34 | 1.19 - 1.50 | 6.03E-07 |
| rs911603    | <i>TNFSF8</i>       | 9    | 117697584     | A/C                | 0.388     | 0.438        | 0.81 | 0.74 - 0.89 | 1.17E-05 |
| rs28734985  | <i>IPMK-UBE2D1</i>  | 10   | 60084051      | G/A                | 0.068     | 0.094        | 0.70 | 0.59 - 0.83 | 4.10E-05 |
| rs1509966   | <i>ADO-EGR2</i>     | 10   | 64552607      | A/G                | 0.415     | 0.471        | 0.80 | 0.73 - 0.87 | 1.47E-06 |
| rs10896027  | <i>MAP3K11-RELA</i> | 11   | 65420760      | G/C                | 0.275     | 0.320        | 0.81 | 0.73 - 0.89 | 2.58E-05 |
| rs9316059   | <i>LACC1</i>        | 13   | 44486789      | T/A                | 0.233     | 0.278        | 0.79 | 0.71 - 0.88 | 1.16E-05 |
| rs4906762   | <i>ATP10A</i>       | 15   | 25986565      | T/C                | 0.207     | 0.248        | 0.79 | 0.71 - 0.89 | 3.81E-05 |
| rs3844576   | <i>SOCS1-TNP2</i>   | 16   | 11357616      | A/C                | 0.298     | 0.249        | 1.28 | 1.15 - 1.42 | 3.09E-06 |
| rs1793978   | <i>CKM-KLC3</i>     | 19   | 45837269      | A/G                | 0.446     | 0.495        | 0.82 | 0.75 - 0.90 | 2.70E-05 |



Supplementary Table 6: Association analysis after imputation of loci with stronger associations than markers on the ImmunoChip (1900 Behçet's disease cases and 1779 controls from Turkey).

| Marker     | Nearest gene(s)     | Chr. | Position hg19 | A1 | A2 | A1 Allele Frequency |          | OR   | 95% CI      | <i>P</i>              | <i>P<sub>GC</sub></i>              | Lead SNP ImmunoChip | <i>r</i> <sup>2</sup> | D'   |
|------------|---------------------|------|---------------|----|----|---------------------|----------|------|-------------|-----------------------|------------------------------------|---------------------|-----------------------|------|
|            |                     |      |               |    |    | cases               | controls |      |             |                       |                                    |                     |                       |      |
| rs6761913  | <i>THADA</i>        | 2    | 43665245      | G  | C  | 0.370               | 0.421    | 0.81 | 0.73 - 0.89 | $1.59 \times 10^{-5}$ | $2.14 \times 10^{-5}$              | rs10176241          | 0.39                  | 0.72 |
| rs79891766 | <i>LONRF2</i>       | 2    | 100869755     | T  | C  | 0.008               | 0.020    | 0.41 | 0.27 - 0.63 | $2.25 \times 10^{-5}$ | $2.99 \times 10^{-5}$              | rs79891766          | 1                     | 1    |
| rs4402765  | <i>IL1A-IL1B</i>    | 2    | 113568847     | C  | G  | 0.345               | 0.278    | 1.40 | 1.20 - 1.50 | $2.22 \times 10^{-9}$ | $3.85 \times 10^{-9}$ <sup>a</sup> | rs3783550           | 0.97                  | 0.99 |
| rs13190001 | <i>C5orf56</i>      | 5    | 131744482     | T  | C  | 0.330               | 0.279    | 1.27 | 1.15 - 1.41 | $2.74 \times 10^{-6}$ | $3.87 \times 10^{-6}$              | rs13190001          | 1                     | 1    |
| rs62443371 | <i>INHBA</i>        | 7    | 41722498      | A  | G  | 0.238               | 0.286    | 0.78 | 0.70 - 0.87 | $6.59 \times 10^{-6}$ | $9.07 \times 10^{-6}$              | rs17705333          | 1                     | 1    |
| rs11785163 | <i>RIPK2</i>        | 8    | 90869409      | A  | C  | 0.250               | 0.195    | 1.37 | 1.21 - 1.55 | $3.55 \times 10^{-7}$ | $5.32 \times 10^{-7}$              | rs10094579          | 1                     | 1    |
| rs1698386  | <i>IPMK-UBE2D1</i>  | 10   | 59928968      | C  | A  | 0.056               | 0.082    | 0.67 | 0.55 - 0.80 | $1.36 \times 10^{-5}$ | $1.83 \times 10^{-5}$              | rs28734985          | 0.0044                | 0.83 |
| rs7075773  | <i>ADO-EGR2</i>     | 10   | 64598621      | T  | C  | 0.275               | 0.343    | 0.73 | 0.66 - 0.81 | $1.69 \times 10^{-9}$ | $2.96 \times 10^{-9}$ <sup>a</sup> | rs1509966           | 0.30                  | 0.77 |
| rs58950470 | <i>MAP3K11-RELA</i> | 11   | 65383755      | T  | G  | 0.258               | 0.315    | 0.76 | 0.68 - 0.84 | $6.25 \times 10^{-7}$ | $9.21 \times 10^{-7}$              | rs10896027          | 0.90                  | 0.99 |
| rs2121033  | <i>LACC1</i>        | 13   | 44475052      | G  | C  | 0.235               | 0.281    | 0.79 | 0.71 - 0.87 | $8.88 \times 10^{-6}$ | $1.21 \times 10^{-5}$              | rs9316059           | 0.99                  | 1    |
| rs61998597 | <i>ATP10A</i>       | 15   | 25987459      | G  | A  | 0.194               | 0.237    | 0.77 | 0.69 - 0.87 | $9.54 \times 10^{-6}$ | $9.54 \times 10^{-6}$              | rs4906762           | 1                     | 1    |
| rs123187   | <i>CKM-KLC3</i>     | 19   | 45830947      | G  | A  | 0.458               | 0.513    | 0.80 | 0.73 - 0.88 | $4.60 \times 10^{-6}$ | $6.40 \times 10^{-6}$              | rs1793978           | 0.97                  | 1    |

<sup>a</sup> Exceeds genome-wide significance.

Supplementary Table 7: Regression analysis in 1900 cases and 1779 controls from Turkey conditioning on the lead genotyped or imputed SNP from each region to test for independent secondary associations.

| Best secondary marker | Nearest gene(s)    | Chr.      | Position hg19   | A1       | A2       | Covariates             | $P_{condition}$                         | OR          | 95% CI             |
|-----------------------|--------------------|-----------|-----------------|----------|----------|------------------------|-----------------------------------------|-------------|--------------------|
| rs4347211             | <i>IL10</i>        | 1         | 206978340       | G        | A        | rs1518110              | $1.11 \times 10^{-4}$                   | 0.80        | 0.71 - 0.89        |
| rs4591347             | <i>IL1A-IL1B</i>   | 2         | 113658705       | T        | C        | rs4402765 <sup>a</sup> | 0.0033                                  | 1.23        | 1.07 - 1.40        |
| rs2097285             | <i>CCR1</i>        | 3         | 46441176        | G        | T        | rs7616215              | $5.37 \times 10^{-4}$                   | 0.73        | 0.61 - 0.87        |
| rs2647935             | <i>IL12A</i>       | 3         | 159684522       | T        | C        | rs17753641             | 0.0057                                  | 1.21        | 1.06 - 1.38        |
| rs224070              | <i>ADO-EGR2</i>    | 10        | 64508418        | A        | G        | rs7075773 <sup>a</sup> | 0.008                                   | 1.17        | 1.04 - 1.31        |
| <b>rs7203487</b>      | <b><i>IRF8</i></b> | <b>16</b> | <b>86016694</b> | <b>C</b> | <b>T</b> | <b>rs11117433</b>      | <b><math>2.99 \times 10^{-5}</math></b> | <b>1.32</b> | <b>1.16 - 1.50</b> |
| rs11860004            | <i>IRF8</i>        | 16        | 86001879        | A        | T        | rs11117433, rs7203487  | 0.036                                   | 0.90        | 0.81 - 0.99        |
| rs13038695            | <i>CEBPB-PTPN1</i> | 20        | 49048440        | G        | A        | rs913678               | 0.33                                    | 1.05        | 0.95 - 1.15        |

Bold indicates the significant  $P$ -value ( $P < 5 \times 10^{-5}$ ).

<sup>a</sup> Imputed marker.

Supplementary Table 8: Replication study in the Iranian population (genotypes determined in 969 cases and 826 controls) for the peak markers from the novel loci identified by Turkish ImmunoChip data

| Marker                  | Nearest gene(s)     | Chr. | Position hg19 | A1 | A2 | A1 Allele Freq. |         | P-value               | OR   | 95% CI      | Statistical Power <sup>a</sup> |
|-------------------------|---------------------|------|---------------|----|----|-----------------|---------|-----------------------|------|-------------|--------------------------------|
|                         |                     |      |               |    |    | Case            | Control |                       |      |             |                                |
| rs10176241              | <i>THADA</i>        | 2    | 43648176      | A  | G  | 0.268           | 0.303   | 0.022                 | 0.84 | 0.73 - 0.98 | 0.34                           |
| rs79891766              | <i>LONRF2</i>       | 2    | 100869755     | T  | C  | 0.019           | 0.016   | 0.45                  | 1.22 | 0.73 - 2.02 | 0.22                           |
| rs3783550               | <i>IL1A-IL1B</i>    | 2    | 113532885     | G  | T  | 0.327           | 0.301   | 0.098                 | 1.13 | 0.98 - 1.31 | 0.80                           |
| rs116379815             | <i>RBM6</i>         | 3    | 50055358      | G  | A  | 0.028           | 0.026   | 0.76                  | 1.07 | 0.71 - 1.60 | 0.95                           |
| rs9819066               | <i>FOXP1</i>        | 3    | 71523110      | T  | C  | 0.396           | 0.366   | 0.072                 | 1.13 | 0.99 - 1.30 | 0.39                           |
| rs11248047              | <i>CPLX1</i>        | 4    | 821553        | A  | G  | 0.435           | 0.456   | 0.21                  | 0.92 | 0.80 - 1.05 | 0.68                           |
| rs13190001              | <i>C5orf56</i>      | 5    | 131744482     | T  | C  | 0.287           | 0.281   | 0.69                  | 1.03 | 0.89 - 1.19 | 0.41                           |
| rs17705333              | <i>INHBA</i>        | 7    | 41718754      | A  | G  | 0.285           | 0.271   | 0.36                  | 1.07 | 0.92 - 1.24 | 0.38                           |
| rs9656588               | <i>IKZF1</i>        | 7    | 50306780      | T  | C  | 0.186           | 0.218   | 0.019                 | 0.82 | 0.70 - 0.97 | 0.47                           |
| rs10094579              | <i>RIPK2</i>        | 8    | 90849305      | A  | C  | 0.168           | 0.136   | 0.0090                | 1.28 | 1.06 - 1.54 | 0.49                           |
| rs911603                | <i>TNFSF8</i>       | 9    | 117697584     | A  | C  | 0.402           | 0.444   | 0.013                 | 0.84 | 0.74 - 0.96 | 0.45                           |
| rs28734985 <sup>b</sup> | <i>IPMK-UBE2D1</i>  | 10   | 60084051      | G  | A  | -               | -       | -                     | -    | -           | -                              |
| rs1509966               | <i>ADO-EGR2</i>     | 10   | 64552607      | A  | G  | 0.434           | 0.493   | 5.09E-04 <sup>c</sup> | 0.79 | 0.69 - 0.90 | 0.56                           |
| rs10896027              | <i>MAP3K11-RELA</i> | 11   | 65420760      | G  | C  | 0.303           | 0.292   | 0.49                  | 1.05 | 0.91 - 1.22 | 0.37                           |
| rs2121033 <sup>b</sup>  | <i>LACC1</i>        | 13   | 44475052      | G  | C  | 0.256           | 0.307   | 0.0012 <sup>c</sup>   | 0.78 | 0.67 - 0.91 | 0.51                           |
| rs4906762               | <i>ATP10A</i>       | 15   | 25986565      | T  | C  | 0.210           | 0.223   | 0.33                  | 0.92 | 0.79 - 1.08 | 0.34                           |
| rs3844576               | <i>SOCS1</i>        | 16   | 11357616      | A  | C  | 0.324           | 0.301   | 0.14                  | 1.11 | 0.96 - 1.28 | 0.61                           |
| rs7203487               | <i>IRF8</i>         | 16   | 86016694      | C  | T  | 0.158           | 0.117   | 4.13E-04 <sup>c</sup> | 1.42 | 1.17 - 1.72 | 0.54                           |
| rs11117433              | <i>IRF8</i>         | 16   | 86019516      | C  | G  | 0.067           | 0.088   | 0.023                 | 0.75 | 0.58 - 0.96 | 0.62                           |
| rs1793978               | <i>CKM</i>          | 19   | 45837269      | T  | C  | 0.436           | 0.443   | 0.68                  | 0.97 | 0.85 - 1.11 | 0.40                           |
| rs913678                | <i>CEBPB-PTPN1</i>  | 20   | 48955424      | C  | T  | 0.483           | 0.420   | 1.59E-04 <sup>c</sup> | 1.29 | 1.13 - 1.48 | 0.86                           |

<sup>a</sup> Statistical power was estimated from effect size in the Turkish population, allele frequency and sample size in the Iranian population.

<sup>b</sup> rs28734985 for *UBE2D1* and rs9316059 for *LACC1* failed in genotyping by TOF-MS. rs2121033, the lead SNP for *LACC1* after imputation, was genotyped instead of rs9316059 ( $r^2 = 0.99$  in Turks).

<sup>c</sup> Significantly replicated ( $P < 0.0014$ , see method).

Supplementary Table 9: Replication study in the Japanese population GWAS imputed data (608 cases and 737 controls) for the peak markers from the novel loci identified by Turkish ImmunoChip data.

| Marker                   | Nearest gene(s)     | Chr. | Position<br>hg19 | A1 | A2 | A1 Allele Freq. |         | P-value               | OR   | 95% CI      | Statistical<br>Power <sup>a</sup> |
|--------------------------|---------------------|------|------------------|----|----|-----------------|---------|-----------------------|------|-------------|-----------------------------------|
|                          |                     |      |                  |    |    | Case            | Control |                       |      |             |                                   |
| rs10176241               | <i>THADA</i>        | 2    | 43648176         | A  | G  | 0.645           | 0.669   | 0.21                  | 0.90 | 0.76 - 1.06 | 0.26                              |
| rs79891766 <sup>b</sup>  | <i>LONRF2</i>       | 2    | 100869755        | T  | C  | -               | -       | -                     | -    | -           | -                                 |
| rs3783550                | <i>IL1A-IL1B</i>    | 2    | 113532885        | G  | T  | 0.767           | 0.748   | 0.24                  | 1.11 | 0.93 - 1.33 | 0.46                              |
| rs116379815 <sup>b</sup> | <i>RBM6</i>         | 3    | 50055358         | G  | A  | -               | -       | -                     | -    | -           | -                                 |
| rs9819066 <sup>b</sup>   | <i>FOXP1</i>        | 3    | 71523110         | T  | C  | -               | -       | -                     | -    | -           | -                                 |
| rs11248047 <sup>b</sup>  | <i>CPLX1</i>        | 4    | 821553           | A  | G  | -               | -       | -                     | -    | -           | -                                 |
| rs13190001               | <i>C5orf56</i>      | 5    | 131744482        | T  | C  | 0.281           | 0.248   | 0.062                 | 1.18 | 0.99 - 1.42 | 0.23                              |
| rs17705333 <sup>b</sup>  | <i>INHBA</i>        | 7    | 41718754         | A  | G  | -               | -       | -                     | -    | -           | -                                 |
| rs9656588                | <i>IKZF1</i>        | 7    | 50306780         | T  | C  | 0.460           | 0.443   | 0.39                  | 1.07 | 0.92 - 1.25 | 0.56                              |
| rs10094579               | <i>RIPK2</i>        | 8    | 90849305         | A  | C  | 0.087           | 0.063   | 0.038                 | 1.43 | 1.02 - 2.00 | 0.11                              |
| rs911603                 | <i>TNFSF8</i>       | 9    | 117697584        | A  | C  | 0.587           | 0.588   | 0.95                  | 0.99 | 0.85 - 1.17 | 0.30                              |
| rs28734985 <sup>b</sup>  | <i>IPMK-UBE2D1</i>  | 10   | 60084051         | G  | A  | -               | -       | -                     | -    | -           | -                                 |
| rs1509966                | <i>ADO-EGR2</i>     | 10   | 64552607         | A  | G  | 0.339           | 0.361   | 0.24                  | 0.91 | 0.77 - 1.07 | 0.32                              |
| rs10896027               | <i>MAP3K11-RELA</i> | 11   | 65420760         | G  | C  | 0.704           | 0.694   | 0.60                  | 1.05 | 0.88 - 1.26 | 0.28                              |
| rs9316059                | <i>LACC1</i>        | 13   | 44486789         | T  | A  | 0.225           | 0.301   | 5.41E-05 <sup>c</sup> | 0.67 | 0.56 - 0.82 | 0.34                              |
| rs4906762                | <i>ATP10A</i>       | 15   | 25986565         | T  | C  | 0.248           | 0.217   | 0.083                 | 1.19 | 0.98 - 1.45 | 0.21                              |
| rs3844576                | <i>SOCS1</i>        | 16   | 11357616         | A  | C  | 0.777           | 0.767   | 0.57                  | 1.06 | 0.87 - 1.28 | 0.28                              |
| rs7203487 <sup>b</sup>   | <i>IRF8</i>         | 16   | 86016694         | C  | T  | -               | -       | -                     | -    | -           | -                                 |
| rs11117433 <sup>b</sup>  | <i>IRF8</i>         | 16   | 86019516         | C  | G  | -               | -       | -                     | -    | -           | -                                 |
| rs1793978 <sup>b</sup>   | <i>CKM</i>          | 19   | 45837269         | T  | C  | -               | -       | -                     | -    | -           | -                                 |
| rs913678 <sup>b</sup>    | <i>CEBPB-PTPN1</i>  | 20   | 48955424         | C  | T  | -               | -       | -                     | -    | -           | -                                 |

<sup>a</sup> Statistical power was estimated from effect size in the Turkish population, allele frequency and sample size in the Japanese population.

<sup>b</sup> SNPs not genotyped or imputed in the Japanese population.

<sup>c</sup> Significantly replicated ( $P < 0.0014$ , see method).

Supplementary Table 10: Meta-analysis of Turkish and Japanese cohorts for the directly genotyped markers from the Turkish collection that replicated in the Japanese cohort.

| Marker    | Nearest gene | A1 | A2 | Turkish |           |                       | Japanese |           |                        | Combined |           |                             |                             |                       |                        |
|-----------|--------------|----|----|---------|-----------|-----------------------|----------|-----------|------------------------|----------|-----------|-----------------------------|-----------------------------|-----------------------|------------------------|
|           |              |    |    | OR      | 95% CI    | <i>P</i>              | OR       | 95% CI    | <i>P</i>               | OR       | 95% CI    | <i>P</i>                    | <i>P<sub>GC</sub></i>       | <i>I</i> <sup>2</sup> | <i>P<sub>het</sub></i> |
| rs9316059 | <i>LACC1</i> | T  | A  | 0.79    | 0.71-0.88 | 1.16×10 <sup>-5</sup> | 0.67     | 0.56-0.82 | 5.41×10 <sup>-5a</sup> | 0.76     | 0.69-0.84 | <b>7.17×10<sup>-9</sup></b> | <b>1.37×10<sup>-8</sup></b> | 0.49                  | 0.16                   |

Bold indicates genome-wide significance in meta-analysis.

<sup>a</sup> Determined with imputed genotypes.

Supplementary Table 11: Meta-analysis between Turkish and Japanese for markers from novel loci with suggestive associations ( $P < 5 \times 10^{-5}$ ) available in imputed data of both Turkish ImmunoChip genotyping and Japanese previous GWAS.

| Marker      | Nearest gene(s) | Chr. | Position hg19 | A1/A2 | Turkish             |       |      |               |                  |      |           |                       | Japanese      |                  |      |           |                       | Combined |           |                                         |                                         |       |           |
|-------------|-----------------|------|---------------|-------|---------------------|-------|------|---------------|------------------|------|-----------|-----------------------|---------------|------------------|------|-----------|-----------------------|----------|-----------|-----------------------------------------|-----------------------------------------|-------|-----------|
|             |                 |      |               |       | Lead SNP ImmunoChip | $r^2$ | $D'$ | A1 Freq. Case | A1 Freq. Control | OR   | 95% CI    | $P$                   | A1 Freq. Case | A1 Freq. Control | OR   | 95% CI    | $P$                   | OR       | 95% CI    | $P$                                     | $P_{GC}$                                | $I^2$ | $P_{het}$ |
| rs2230801   | <i>RIPK2</i>    | 8    | 90784979      | C/T   | rs10094579          | 0.38  | 0.98 | 0.108         | 0.079            | 1.43 | 1.22-1.68 | $9.60 \times 10^{-6}$ | 0.030         | 0.009            | 3.41 | 1.80-6.47 | $6.39 \times 10^{-5}$ | 1.52     | 1.30-1.77 | <b><math>4.89 \times 10^{-9}</math></b> | <b><math>6.57 \times 10^{-9}</math></b> | 0.25  | 0.25      |
| rs224127    | <i>ADO-EGR2</i> | 10   | 64461273      | A/G   | rs1509966           | 0.48  | 0.85 | 0.475         | 0.418            | 1.26 | 1.15-1.39 | $1.56 \times 10^{-6}$ | 0.587         | 0.621            | 1.30 | 1.11-1.51 | 0.0011                | 1.27     | 1.17-1.38 | <b><math>6.62 \times 10^{-9}</math></b> | <b><math>9.46 \times 10^{-9}</math></b> | 0     | 0.81      |
| rs2121033   | <i>LACC1</i>    | 13   | 44475052      | G/C   | rs9316059           | 0.99  | 1    | 0.235         | 0.281            | 0.79 | 0.71-0.87 | $8.88 \times 10^{-6}$ | 0.275         | 0.353            | 0.69 | 0.58-0.83 | $4.68 \times 10^{-5}$ | 0.76     | 0.69-0.83 | <b><math>4.09 \times 10^{-9}</math></b> | <b><math>5.51 \times 10^{-9}</math></b> | 0.42  | 0.19      |
| rs142105922 | <i>IRF8</i>     | 16   | 86002593      | AAT/- | rs11117433          | 0.62  | 0.95 | 0.050         | 0.077            | 0.63 | 0.52-0.77 | $5.58 \times 10^{-6}$ | 0.053         | 0.087            | 0.59 | 0.43-0.82 | 0.0013                | 0.62     | 0.53-0.74 | <b><math>3.01 \times 10^{-8}</math></b> | <b><math>4.14 \times 10^{-8}</math></b> | 0     | 0.65      |

Bold indicates genome-wide significance.

Supplementary Table 12: Regression analysis of the lead/independent markers genotyped by the Immunochip for the locus identified in meta-analysis of the Turkish and Japanese cohorts conditioning on the lead markers .

| Marker      | Nearest gene(s) | Chr. | Position<br>hg19 | A1  | A2 | Lead/independent<br>marker | $P_{condition}$ | OR   | 95% CI      |
|-------------|-----------------|------|------------------|-----|----|----------------------------|-----------------|------|-------------|
| rs2230801   | <i>RIPK2</i>    | 8    | 90784979         | C   | T  | rs10094579                 | 0.094           | 1.19 | 0.97 - 1.45 |
| rs224127    | <i>ADO-EGR2</i> | 10   | 64461273         | A   | G  | rs1509966                  | 0.095           | 1.11 | 0.98 - 1.26 |
| rs2121033   | <i>LACC1</i>    | 13   | 44475052         | G   | C  | rs9316059                  | 0.27            | 0.47 | 0.12 - 1.89 |
| rs142105922 | <i>IRF8</i>     | 16   | 86002593         | AAT | -  | rs11117433                 | 0.50            | 0.90 | 0.66 - 1.23 |
| rs142105922 | <i>IRF8</i>     | 16   | 86002593         | AAT | -  | rs7203487 <sup>a</sup>     | 5.67E-05        | 0.67 | 0.55 - 0.81 |

<sup>a</sup> rs7203487 is the disease susceptible SNP with independent association from rs11117433.

Supplementary Table 13: Results of the basic association test in the Iranian population for markers identified in the meta-analysis for Turkish and Japanese populations.

| Marker                 | Nearest gene(s)     | Chr.      | Position hg19   | A1       | A2       | Iranian       |                  |             |                    |               |                                |
|------------------------|---------------------|-----------|-----------------|----------|----------|---------------|------------------|-------------|--------------------|---------------|--------------------------------|
|                        |                     |           |                 |          |          | A1 Freq. Case | A1 Freq. Control | OR          | 95% CI             | P             | Statistical Power <sup>a</sup> |
| rs2230801              | <i>RIPK2</i>        | 8         | 90784979        | C        | T        | 0.064         | 0.058            | 1.11        | 0.84 - 1.46        | 0.47          | 0.32                           |
| rs224127               | <i>ADO-EGR2</i>     | 10        | 64461273        | A        | G        | 0.426         | 0.387            | 1.18        | 1.03 - 1.35        | 0.017         | 0.59                           |
| <b>rs2121033</b>       | <b><i>LACC1</i></b> | <b>13</b> | <b>44475052</b> | <b>G</b> | <b>C</b> | <b>0.256</b>  | <b>0.307</b>     | <b>0.78</b> | <b>0.67 - 0.91</b> | <b>0.0012</b> | <b>0.51</b>                    |
| rs1401884 <sup>b</sup> | <i>IRF8</i>         | 16        | 86013551        | C        | G        | 0.048         | 0.069            | 0.68        | 0.51 - 0.91        | 0.0088        | 0.47                           |

<sup>a</sup>Statistical power was estimated from effect size in the Turkish population, allele frequency and sample size in the Iranian population.

<sup>b</sup>rs142105922 for *IRF8* failed in genotyping by TOF-MS. rs1401884 in high LD with rs142105922 was genotyped ( $r^2 = 0.84$ ).

Bold indicates significant association in the replication study.



Supplementary Table 14: Description of susceptibility markers for Behcet's disease in the current study.

| SNP         | Locus              | Annotation             | Regulatory Features                                                                                                    | Functional effects of disease risk allele                                                                                                                                                                                                                                                                                                      | Gene Function                                                                                                                                                                                                                                                                                                                                                                      |
|-------------|--------------------|------------------------|------------------------------------------------------------------------------------------------------------------------|------------------------------------------------------------------------------------------------------------------------------------------------------------------------------------------------------------------------------------------------------------------------------------------------------------------------------------------------|------------------------------------------------------------------------------------------------------------------------------------------------------------------------------------------------------------------------------------------------------------------------------------------------------------------------------------------------------------------------------------|
| rs3783550   | <i>IL1A-IL1B</i>   | Intronic               | Promotor histone marks, DNase, Motifs changed                                                                          | <i>IL1A</i> : Decreased gene exprsion (Skin, Lymphoblastoid cell)                                                                                                                                                                                                                                                                              | <i>IL1A</i> : IL-1 $\alpha$ is highly expressed in the epidermis and plays an important role in skin barrier functions against pathogens <sup>11</sup> .<br><i>IL1B</i> : IL-1 $\beta$ is processed to its active form by caspase-1, a component of the activated inflammasome, and is an important mediator of the inflammatory response <sup>12</sup> .                          |
| rs4402765   |                    | Intergenic             | Enhancer histone marks, Motifs changed                                                                                 | <i>IL1A</i> : Decreased gene expression (Skin, Lymphoblastoid cell)                                                                                                                                                                                                                                                                            |                                                                                                                                                                                                                                                                                                                                                                                    |
| rs2230801   | <i>RIPK2</i>       | Missense (p.Ile259Thr) | Evolutionarily conserved regions, Enhancer histone marks                                                               | <i>RIPK2</i> : Possibly damaging (p.Ile259Thr)                                                                                                                                                                                                                                                                                                 | <i>RIPK2</i> : <i>RIPK2</i> encodes receptor-interacting serine-threonine kinase 2, which acts in the NOD2 response to the lipoprotein Pam-3Cys and muramyl dipeptide (MDP), a component of peptidoglycan from bacteria <sup>13</sup> .                                                                                                                                            |
| rs1509966   | <i>ADO-EGR2</i>    | Intergenic             | Enhancer histone marks, DNase, Motifs changed                                                                          | <i>ADO</i> : Increased gene expression (Muscle)<br><i>ADO</i> : Decreased gene expression (Testis)                                                                                                                                                                                                                                             | <i>ADO</i> : ADO encodes cysteamine (2-aminoethanethiol) dioxygenase, which exhibits cysteamine dioxygenase activity <sup>14</sup> .<br><i>EGR2</i> : EGR2 is an important transcription factor involved in T cell anergy and regulation of IL-2 and IFN $\gamma$ , and involved in the differentiation of LAG3+ regulatory T cells, which highly express IL-10 <sup>15,16</sup> . |
| rs7075773   |                    | Intergenic             | Motifs changed                                                                                                         | <i>ADO</i> : Increased gene expression (Lung)                                                                                                                                                                                                                                                                                                  |                                                                                                                                                                                                                                                                                                                                                                                    |
| rs224127    |                    | Intergenic             | Motifs changed                                                                                                         | <i>ADO</i> : Increased gene expression (whole blood, Muscle)<br><i>ADO</i> : Decreased gene expression (Testis)                                                                                                                                                                                                                                |                                                                                                                                                                                                                                                                                                                                                                                    |
| rs2121033   |                    | <i>LACC1</i>           | Intergenic <sup>a</sup>                                                                                                | Motifs changed                                                                                                                                                                                                                                                                                                                                 |                                                                                                                                                                                                                                                                                                                                                                                    |
| rs11117433  | <i>IRF8</i>        | Intergenic             | Promotor histone marks, Enhancer histone marks, DNase, Motifs changed                                                  | <i>LACC1</i> : <i>LACC1</i> encodes laccase (multicopper oxidoreductase) domain containing 1, which is highly expressed in macrophages and involved in immunometabolic function through increasing fatty-acid oxidation and promoting glycolysis <sup>17</sup> .<br><i>CCDC122</i> : <i>CCDC122</i> encodes coiled-coil domain containing 122. |                                                                                                                                                                                                                                                                                                                                                                                    |
| rs7203487   |                    | Intergenic             | Promotor histone marks, Enhancer histone marks, DNase                                                                  |                                                                                                                                                                                                                                                                                                                                                | <i>IRF8</i> : IRF8 is a transcription factor that plays roles in innate immune responses and adaptive immune cell development <sup>18</sup> .                                                                                                                                                                                                                                      |
| rs142105922 |                    | Intergenic             | Enhancer histone marks, Motifs changed                                                                                 |                                                                                                                                                                                                                                                                                                                                                |                                                                                                                                                                                                                                                                                                                                                                                    |
| rs913678    | <i>CEBPB-PTPN1</i> | Intergenic             | Evolutionarily conserved regions, Promotor histone marks, Enhancer histone marks, Protein bound, DNase, Motifs changed | <i>CEBPB</i> : Decreased gene expression (Whole blood)                                                                                                                                                                                                                                                                                         | <i>CEBPB</i> : C/EBP $\beta$ is known to play a fundamental role in the antibacterial activity of macrophages <sup>19</sup> .<br><i>PTPN1</i> : PTPN1 is an enzyme that dephosphorylates JAK2 and TYK2, members of Janus kinase (JAK) family, which interact with the IL-12 receptor and the IL-23 receptor <sup>20</sup> .                                                        |

Features of susceptibility markers in the current study were investigated using Haploreg v4.1. Functional effects of nonsynonymous coding variants were predicted by Polyphen-2. eQTL data were extracted from Genevar, Blood eQTL browser and GTEx.

<sup>a</sup>The missense variant of *LACC1*, rs3764147 (p.Ile254Val), which is predicted benign, is in high LD with rs2121033 ( $r^2=0.93$ ).

Supplementary Table 15: Disease association for homozygous *FUT2* non-secretor alleles of two ancestry-specific single nucleotide polymorphisms.

| Population                  | Marker                | Non-secretor Allele | <i>FUT2</i> Mutation | Homozygote Freq. |         | OR          | 95% CI             | <i>P</i>                     |
|-----------------------------|-----------------------|---------------------|----------------------|------------------|---------|-------------|--------------------|------------------------------|
|                             |                       |                     |                      | Case             | Control |             |                    |                              |
| Turkish                     | rs601338 <sup>a</sup> | A                   | p.Trp143Ter          | 0.354            | 0.264   | 1.52        | 1.32 - 1.76        | 6.51×10 <sup>-9</sup>        |
| Iranian                     | rs601338              | A                   | p.Trp143Ter          | 0.312            | 0.220   | 1.61        | 1.30 - 2.00        | 1.65×10 <sup>-5</sup>        |
| Japanese                    | rs1047781             | T                   | p.Ile129Phe          | 0.214            | 0.141   | 1.66        | 1.24 - 2.22        | 6.50×10 <sup>-4</sup>        |
| <b>Combined<sup>b</sup></b> |                       |                     |                      |                  |         | <b>1.56</b> | <b>1.40 - 1.75</b> | <b>5.89×10<sup>-15</sup></b> |

<sup>a</sup> Imputed data.

<sup>b</sup> *P*-value for heterogeneity is 0.83 and *I*<sup>2</sup> is 0.

Supplementary Table 16: Overlap of susceptibility genes for Behçet's disease with inflammatory bowel disease (Crohn's disease and ulcerative colitis) and leprosy.

| Disease            | Number of Genes |        | Enrichment<br>(fold) | <i>P</i>               |
|--------------------|-----------------|--------|----------------------|------------------------|
|                    | Total           | Shared |                      |                        |
| IBD                | 146             | 11     | 98.5                 | $< 1.0 \times 10^{-6}$ |
| Crohn's disease    | 120             | 10     | 109.1                | $< 1.0 \times 10^{-6}$ |
| Ulcerative colitis | 99              | 5      | 66.3                 | $< 1.0 \times 10^{-6}$ |
| Leprosy            | 18              | 4      | 290.5                | $< 1.0 \times 10^{-6}$ |

Supplementary Table 17: Association of susceptibility genes for Behçet's disease in other immune-related diseases and leprosy.

| Locus                                | Marker          | IBD         | Pso      | CeD        | MS | AS       | PBC        | SLE | RA | T1D      | SSc | SJO | JIA | CD <sup>a</sup> | UC <sup>a</sup> | Leprosy   |
|--------------------------------------|-----------------|-------------|----------|------------|----|----------|------------|-----|----|----------|-----|-----|-----|-----------------|-----------------|-----------|
| MHC Class I                          | <i>HLA-B*51</i> |             |          |            |    |          |            |     |    |          |     |     |     |                 |                 |           |
| <b><i>IL1A-IL1B</i></b> <sup>b</sup> | rs4402765       |             |          |            |    |          |            |     |    |          |     |     |     |                 |                 |           |
| <i>MEFV</i>                          | p.Met694Val     |             |          |            |    |          |            |     |    |          |     |     |     |                 |                 |           |
| <i>KLRC4</i>                         | rs2617170       |             |          |            |    |          |            |     |    |          |     |     |     |                 |                 |           |
| <b><i>CEBPB-PTPN1</i></b>            | rs913678        | rs913678    |          |            |    |          |            |     |    |          |     |     |     |                 | rs913678        |           |
| <i>CCR1</i>                          | rs7616215       |             |          |            |    |          |            |     |    |          |     |     |     |                 |                 |           |
| <b><i>RIPK2</i></b>                  | rs2230801       |             |          |            |    |          |            |     |    |          |     |     |     |                 |                 |           |
| <b><i>LACC1</i></b> <sup>c</sup>     | rs2121033       | rs3764147   |          |            |    |          |            |     |    |          |     |     |     | rs3764147       |                 | rs3764147 |
| <i>FUT2</i>                          | rs601338        | rs516246    |          |            |    |          |            |     |    | rs516246 |     |     |     | rs516246        |                 |           |
| <b><i>ADO-EGR2</i></b>               | rs7075773       | rs10761659* |          |            |    |          |            |     |    |          |     |     |     | rs10761659*     | rs10761659*     |           |
| <i>ERAP1</i>                         | rs17482078      | rs1363907*  | rs27432* |            |    | rs30187* |            |     |    |          |     |     |     | rs1363907*      |                 |           |
| <i>IL10</i>                          | rs1518111       |             |          |            |    |          |            |     |    |          |     |     |     |                 |                 |           |
| <b><i>IRF8</i></b>                   | rs11117433      |             |          |            |    |          | rs11117433 |     |    |          |     |     |     |                 |                 |           |
| <i>IL12A</i>                         | rs17810546      |             |          | rs17810546 |    |          |            |     |    |          |     |     |     |                 |                 |           |
| <b><i>IL23R-IL12RB2</i></b>          | rs1495965       |             |          |            |    |          |            |     |    |          |     |     |     |                 |                 |           |
| <i>TNFAIP3</i> <sup>b</sup>          | rs9494885       |             |          |            |    |          |            |     |    |          |     |     |     |                 |                 |           |
| <i>STAT4</i>                         | rs7574070       |             |          |            |    |          |            |     |    |          |     |     |     |                 |                 |           |

Susceptibility loci with  $P < 5 \times 10^{-8}$  for Behçet's disease and the corresponding effect of these markers in other immune related diseases are shown in the table<sup>1-10,21-45</sup>. Comparisons of the effect directions between disease-associated markers are shown by color, where pink indicates concordance of risk alleles between diseases and blue indicates discordance of risk alleles. Grey boxes mark diseases that share risk loci with Behçet's disease, but for which no commonality between markers associated with the two diseases could be identified. In cases where disease-associated markers were different, the alleles used for concordance analyses were defined by MAF for markers with high LD ( $r^2 > 0.8$ ) or by eQTL directional concordance (increasing or decreasing gene expression) of the disease risk alleles for markers identified as eQTLs (bold markers mark alleles identified by MAF; asterisks mark alleles identified by eQTL directional concordance).

<sup>a</sup>The subgroups of inflammatory bowel disease, Crohn's disease and ulcerative colitis, are separately displayed.

<sup>b</sup>*IL1A-IL1B* and *TNFAIP3* showed genome-wide significance in a single population and has not been replicated in independent cohorts.

<sup>c</sup>*LACC1* was identified in Mendelian systemic JIA<sup>44</sup> and CD families<sup>45</sup>

IBD, inflammatory bowel disease; Pso, psoriasis; CeD, celiac disease; MS, multiple sclerosis; AS, ankylosing spondylitis; PBC, primary biliary cirrhosis; SLE, systemic lupus erythematosus; RA, rheumatoid arthritis; T1D, type 1 diabetes; SSc, systemic sclerosis; SJO, Sjögren's syndrome; JIA, juvenile idiopathic arthritis; CD, Crohn's disease; UC, ulcerative colitis

Supplementary Table 18: Pathway analysis for 21 genes associated with Behçet's disease.

| Rank | Pathway                                      | Count | Genes                                                                         | $P_{corrected}$ |
|------|----------------------------------------------|-------|-------------------------------------------------------------------------------|-----------------|
| 1    | defense response                             | 11    | <i>KLRC4, CEBPB, IL23R, MEFV, CCR1, IL12A, IL1B, RIPK2, HLA-B, IL10, IL1A</i> | 1.50E-06        |
| 2    | inflammatory response                        | 8     | <i>CEBPB, IL23R, MEFV, CCR1, IL1B, RIPK2, IL10, IL1A</i>                      | 3.70E-05        |
| 3    | immune response                              | 10    | <i>CEBPB, IL23R, CCR1, IRF8, IL12A, ERAP1, IL1B, HLA-B, IL10, IL1A</i>        | 4.20E-05        |
| 4    | response to bacterium                        | 6     | <i>IL12RB2, IL12A, ERAP1, IL1B, RIPK2, IL10</i>                               | 4.50E-04        |
| 5    | response to wounding                         | 8     | <i>CEBPB, IL23R, MEFV, CCR1, IL1B, RIPK2, IL10, IL1A</i>                      | 4.90E-04        |
| 6    | response to molecule of bacterial origin     | 5     | <i>IL12RB2, IL12A, IL1B, RIPK2, IL10</i>                                      | 5.10E-04        |
| 7    | regulation of cytokine production            | 6     | <i>CEBPB, IL12A, IL1B, RIPK2, IL10, IL1A</i>                                  | 5.30E-04        |
| 8    | anti-apoptosis                               | 6     | <i>CEBPB, IL1B, RIPK2, TNFAIP3, IL10, IL1A</i>                                | 5.50E-04        |
| 9    | response to lipopolysaccharide               | 5     | <i>IL12RB2, IL12A, IL1B, RIPK2, IL10</i>                                      | 5.70E-04        |
| 10   | regulation of interleukin-6 production       | 4     | <i>CEBPB, IL1B, RIPK2, IL10</i>                                               | 0.00110         |
| 11   | regulation of T cell proliferation           | 4     | <i>IL12A, IL1B, RIPK2, IL10</i>                                               | 0.0050          |
| 12   | negative regulation of cell death            | 6     | <i>CEBPB, IL1B, RIPK2, TNFAIP3, IL10, IL1A</i>                                | 0.0051          |
| 13   | cytokine-mediated signaling pathway          | 4     | <i>STAT4, CCR1, IL1B, IL1A</i>                                                | 0.0052          |
| 14   | negative regulation of programmed cell death | 6     | <i>CEBPB, IL1B, RIPK2, TNFAIP3, IL10, IL1A</i>                                | 0.0055          |
| 15   | negative regulation of apoptosis             | 6     | <i>CEBPB, IL1B, RIPK2, TNFAIP3, IL10, IL1A</i>                                | 0.0055          |
| 16   | regulation of cytokine biosynthetic process  | 4     | <i>CEBPB, IL1B, IL10, IL1A</i>                                                | 0.0058          |
| 17   | regulation of mononuclear cell proliferation | 4     | <i>IL12A, IL1B, RIPK2, IL10</i>                                               | 0.0075          |
| 18   | regulation of leukocyte proliferation        | 4     | <i>IL12A, IL1B, RIPK2, IL10</i>                                               | 0.0075          |
| 19   | regulation of lymphocyte proliferation       | 4     | <i>IL12A, IL1B, RIPK2, IL10</i>                                               | 0.0077          |
| 20   | positive regulation of cytokine production   | 4     | <i>IL12A, IL1B, RIPK2, IL1A</i>                                               | 0.0087          |
| 21   | response to organic substance                | 7     | <i>IL12RB2, EGR2, IL12A, IL1B, RIPK2, PTPN1, IL10</i>                         | 0.0110          |
| 22   | positive regulation of angiogenesis          | 3     | <i>ERAP1, IL1B, IL1A</i>                                                      | 0.017           |
| 23   | regulation of T cell activation              | 4     | <i>IL12A, IL1B, RIPK2, IL10</i>                                               | 0.017           |
| 24   | regulation of cell death                     | 7     | <i>CEBPB, IL12A, IL1B, RIPK2, TNFAIP3, IL10, IL1A</i>                         | 0.017           |
| 25   | regulation of apoptosis                      | 7     | <i>CEBPB, IL12A, IL1B, RIPK2, TNFAIP3, IL10, IL1A</i>                         | 0.017           |
| 26   | regulation of programmed cell death          | 7     | <i>CEBPB, IL12A, IL1B, RIPK2, TNFAIP3, IL10, IL1A</i>                         | 0.017           |
| 27   | regulation of interleukin-2 production       | 3     | <i>IL1B, RIPK2, IL1A</i>                                                      | 0.020           |
| 28   | regulation of lymphocyte activation          | 4     | <i>IL12A, IL1B, RIPK2, IL10</i>                                               | 0.026           |
| 29   | positive regulation of T cell proliferation  | 3     | <i>IL12A, IL1B, RIPK2</i>                                                     | 0.031           |
| 30   | acute-phase response                         | 3     | <i>CEBPB, IL1B, IL1A</i>                                                      | 0.031           |
| 31   | regulation of leukocyte activation           | 4     | <i>IL12A, IL1B, RIPK2, IL10</i>                                               | 0.032           |
| 32   | regulation of cell activation                | 4     | <i>IL12A, IL1B, RIPK2, IL10</i>                                               | 0.036           |

Supplementary Table 19: International Criteria for Behçet's disease

| Sign/symptom                        | Points |
|-------------------------------------|--------|
| Ocular lesions                      | 2      |
| Genital aphthous                    | 2      |
| Oral aphthous                       | 2      |
| Skin lesions                        | 1      |
| Neurological manifestations         | 1      |
| Vascular manifestations             | 1      |
| Positive pathergy test <sup>a</sup> | 1      |

Scoring  $\geq 4$  indicates Behçet's disease

<sup>a</sup>Pathergy test is optional.

Supplementary Table 20: Japanese Behçet's disease criteria

---

**Major symptom**

- Recurrent aphthous ulcerations of the oral mucous membrane
- Skin lesions
- Ocular symptoms
- Genital ulcers

**Minor symptom**

- Arthritis
  - Epididymitis
  - Gastrointestinal lesions
  - Vascular lesions
  - Central nervous system symptoms
- 

(1) three major symptoms or two major and two minor symptoms; or (2) typical ocular symptoms and another major symptom or two minor symptoms that appear during the clinical course.

Supplementary Table 21: Characteristics of Turkish, Iranian and Japanese populations.

| Characteristics                    | Discovery       | Replication    |           |                       |
|------------------------------------|-----------------|----------------|-----------|-----------------------|
|                                    | Turkish         | Iranian        |           | Japanese              |
| N (cases / controls)               | 1900 / 1779     | 982 / 826      |           | 608 / 737             |
| Male / Female (%)                  | 53.4 / 46.6     | 52.2 / 47.8    | <i>NS</i> | 59.7 / 40.3 <i>NS</i> |
| Onset age, mean $\pm$ SD           | 38.7 $\pm$ 11.6 | 32.1 $\pm$ 9.1 | *         | 33.7 $\pm$ 10.4 *     |
| Recurrent oral aphthous ulcers (%) | 99.8            | 98.9           | *         | 98.1 *                |
| Uveitis (%)                        | 39.4            | 56.3           | *         | 86.9 *                |
| Genital ulcers (%)                 | 77.8            | 62.8           | *         | 60.6 *                |
| Skin lesions (%)                   | 87.2            | 52.4           | *         | 86.6 <i>NS</i>        |
| Pathergy reaction (%)              | 67.6            | 45.5           | *         | 55.9 <i>NS</i>        |
| Arthritis (%)                      | 45.3            | 19.1           | *         | 40.7 <i>NS</i>        |
| Vascular involvement (%)           | 23.2            | 5.2            | *         | 4.5 *                 |
| Neurologic involvement (%)         | 7.4             | 6.2            | <i>NS</i> | 6.3 <i>NS</i>         |
| Intestinal involvement (%)         | 1.3             | 4.1            | *         | 14.9 *                |
| Positive family history (%)        | 19.2            | 8.6            | *         | 3.2 *                 |

\**P* < 0.05 in comparison between Turkish and replication collections.

*NS*, No significance



## Reference

- 1 Mizuki, N. *et al.* Genome-wide association studies identify IL23R-IL12RB2 and IL10 as Behcet's disease susceptibility loci. *Nat Genet* **42**, 703-6 (2010).
- 2 Remmers, E.F. *et al.* Genome-wide association study identifies variants in the MHC class I, IL10, and IL23R-IL12RB2 regions associated with Behcet's disease. *Nat Genet* **42**, 698-702 (2010).
- 3 Hou, S. *et al.* Two-stage association study in Chinese Han identifies two independent associations in CCR1/CCR3 locus as candidate for Behcet's disease susceptibility. *Hum Genet* **131**, 1841-50 (2012).
- 4 Hou, S. *et al.* Identification of a susceptibility locus in STAT4 for Behcet's disease in Han Chinese in a genome-wide association study. *Arthritis Rheum* **64**, 4104-13 (2012).
- 5 Kirino, Y. *et al.* Genome-wide association analysis identifies new susceptibility loci for Behcet's disease and epistasis between HLA-B\*51 and ERAP1. *Nat Genet* **45**, 202-7 (2013).
- 6 Kirino, Y. *et al.* Targeted resequencing implicates the familial Mediterranean fever gene MEFV and the toll-like receptor 4 gene TLR4 in Behcet disease. *Proc Natl Acad Sci U S A* **110**, 8134-9 (2013).
- 7 Li, H. *et al.* TNFAIP3 gene polymorphisms confer risk for Behcet's disease in a Chinese Han population. *Hum Genet* **132**, 293-300 (2013).
- 8 Xavier, J.M. *et al.* FUT2: filling the gap between genes and environment in Behcet's disease? *Ann Rheum Dis* **74**, 618-24 (2015).
- 9 Kappen, J.H. *et al.* Genome-wide association study in an admixed case series reveals IL12A as a new candidate in Behcet disease. *PLoS One* **10**, e0119085 (2015).
- 10 Ortiz-Fernandez, L. *et al.* Genetic Analysis with the Immunochip Platform in Behcet Disease. Identification of Residues Associated in the HLA Class I Region and New Susceptibility Loci. *PLoS One* **11**, e0161305 (2016).
- 11 Barland, C.O. *et al.* Imiquimod-induced interleukin-1 alpha stimulation improves barrier homeostasis in aged murine epidermis. *J Invest Dermatol* **122**, 330-6 (2004).
- 12 Gabay, C., Lamacchia, C. & Palmer, G. IL-1 pathways in inflammation and human diseases. *Nat Rev Rheumatol* **6**, 232-41 (2010).
- 13 Jun, J.C., Cominelli, F. & Abbott, D.W. RIP2 activity in inflammatory disease and implications for novel therapeutics. *J Leukoc Biol* **94**, 927-32 (2013).
- 14 Dominy, J.E., Jr. *et al.* Discovery and characterization of a second mammalian thiol dioxygenase, cysteamine dioxygenase. *J Biol Chem* **282**, 25189-98 (2007).
- 15 Safford, M. *et al.* Egr-2 and Egr-3 are negative regulators of T cell activation. *Nat Immunol* **6**, 472-80 (2005).
- 16 Okamura, T. *et al.* CD4+CD25-LAG3+ regulatory T cells controlled by the transcription factor Egr-2. *Proc Natl Acad Sci U S A* **106**, 13974-9 (2009).
- 17 Cader, M.Z. *et al.* C13orf31 (FAMIN) is a central regulator of immunometabolic function. *Nat Immunol* (2016).
- 18 Kurotaki, D. & Tamura, T. Transcriptional and Epigenetic Regulation of Innate Immune Cell Development by the Transcription Factor, Interferon Regulatory Factor-8. *J Interferon Cytokine Res* **36**, 433-41 (2016).
- 19 Huber, R., Pietsch, D., Panterodt, T. & Brand, K. Regulation of C/EBPbeta and resulting functions in cells of the monocytic lineage. *Cell Signal* **24**, 1287-96 (2012).
- 20 Myers, M.P. *et al.* TYK2 and JAK2 are substrates of protein-tyrosine phosphatase 1B. *J Biol Chem* **276**, 47771-4 (2001).
- 21 Franke, A. *et al.* Genome-wide meta-analysis increases to 71 the number of confirmed Crohn's disease susceptibility loci. *Nat Genet* **42**, 1118-25 (2010).
- 22 Tsoi, L.C. *et al.* Identification of 15 new psoriasis susceptibility loci highlights the role of innate immunity. *Nat Genet* **44**, 1341-8 (2012).
- 23 Jostins, L. *et al.* Host-microbe interactions have shaped the genetic architecture of inflammatory bowel disease. *Nature* **491**, 119-24 (2012).
- 24 Liu, J.Z. *et al.* Association analyses identify 38 susceptibility loci for inflammatory bowel disease and highlight shared genetic risk across populations. *Nat Genet* **47**, 979-86 (2015).
- 25 Dubois, P.C. *et al.* Multiple common variants for celiac disease influencing immune gene expression. *Nat Genet* **42**, 295-302 (2010).
- 26 Trynka, G. *et al.* Dense genotyping identifies and localizes multiple common and rare variant association signals in celiac disease. *Nat Genet* **43**, 1193-201 (2011).
- 27 International Multiple Sclerosis Genetics, C. *et al.* Analysis of immune-related loci identifies 48 new susceptibility variants for multiple sclerosis. *Nat Genet* **45**, 1353-60 (2013).
- 28 Reveille, J.D. *et al.* Genome-wide association study of ankylosing spondylitis identifies non-MHC susceptibility loci. *Nat Genet* **42**, 123-7 (2010).
- 29 International Genetics of Ankylosing Spondylitis, C. *et al.* Identification of multiple risk variants for ankylosing spondylitis through high-density genotyping of immune-related loci. *Nat Genet* **45**, 730-8 (2013).
- 30 Liu, J.Z. *et al.* Dense fine-mapping study identifies new susceptibility loci for primary biliary cirrhosis. *Nat Genet* **44**, 1137-41 (2012).
- 31 Gateva, V. *et al.* A large-scale replication study identifies TNIP1, PRDM1, JAZF1, UHRF1BP1 and IL10 as risk loci for systemic lupus erythematosus. *Nat Genet* **41**, 1228-33 (2009).
- 32 Armstrong, D.L. *et al.* GWAS identifies novel SLE susceptibility genes and explains the association of the HLA region. *Genes Immun* **15**, 347-54 (2014).
- 33 Eyre, S. *et al.* High-density genetic mapping identifies new susceptibility loci for rheumatoid arthritis. *Nat Genet* **44**, 1336-40 (2012).
- 34 Okada, Y. *et al.* Genetics of rheumatoid arthritis contributes to biology and drug discovery. *Nature* **506**, 376-81 (2014).
- 35 Barrett, J.C. *et al.* Genome-wide association study and meta-analysis find that over 40 loci affect risk of type 1 diabetes. *Nat Genet* **41**, 703-7 (2009).
- 36 Mayes, M.D. *et al.* Immunochip analysis identifies multiple susceptibility loci for systemic sclerosis. *Am J Hum Genet* **94**, 47-61 (2014).
- 37 Lessard, C.J. *et al.* Variants at multiple loci implicated in both innate and adaptive immune responses are associated with Sjogren's syndrome. *Nat Genet* **45**, 1284-92 (2013).
- 38 Bradfield, J.P. *et al.* A genome-wide meta-analysis of six type 1 diabetes cohorts identifies multiple associated loci. *PLoS Genet* **7**, e1002293 (2011).
- 39 Onengut-Gumuscu, S. *et al.* Fine mapping of type 1 diabetes susceptibility loci and evidence for colocalization of causal variants with lymphoid gene enhancers. *Nat Genet* **47**, 381-6 (2015).
- 40 Hinks, A. *et al.* Dense genotyping of immune-related disease regions identifies 14 new susceptibility loci for juvenile idiopathic arthritis. *Nat Genet* **45**, 664-9 (2013).
- 41 Anderson, C.A. *et al.* Meta-analysis identifies 29 additional ulcerative colitis risk loci, increasing the number of confirmed associations to 47. *Nat Genet* **43**, 246-52 (2011).
- 42 Zhang, F.R. *et al.* Genomewide association study of leprosy. *N Engl J Med* **361**, 2609-18 (2009).
- 43 Liu, H. *et al.* Discovery of six new susceptibility loci and analysis of pleiotropic effects in leprosy. *Nat Genet* **47**, 267-71 (2015).
- 44 Wakil, S.M. *et al.* Association of a mutation in LACC1 with a monogenic form of systemic juvenile idiopathic arthritis. *Arthritis Rheumatol* **67**, 288-95 (2015).
- 45 Patel, N. *et al.* Study of Mendelian forms of Crohn's disease in Saudi Arabia reveals novel risk loci and alleles. *Gut* **63**, 1831-2 (2014).
